1 **Mitogenome and nuclear DNA differentiation in spinner (*Stenella longirostris*) and**  
2 **pantropical spotted dolphins (*S. attenuata*) from the eastern tropical Pacific Ocean**

3

4 Leslie, Matthew S.,<sup>1,2\*</sup> Archer, Frederick I.,<sup>2,1</sup> Morin, Phillip A.<sup>2,1</sup>

5

6

7 1. Scripps Institution of Oceanography, University of California San Diego, mail-code

8 0208, 9500 Gilman Dr. La Jolla, CA, 92093 USA

9

10 2. Southwest Fisheries Science Center, National Marine Fisheries Service, NOAA, 8901

11 La Jolla Shores Dr., La Jolla, CA 92037, USA

12

13

14 \*Author for correspondence: mleslie@ucsd.edu

15

16

17 **Running Title:** Population structure of pelagic dolphins

18

19 **Keywords:** mitogenomics, conservation genetics, pelagic dolphins, single nucleotide

20 polymorphisms.

21

22

23 **Abstract:**

24 Endemic subspecies and multiple stocks have been proposed for spinner (*Stenella*  
25 *longirostris*) and spotted dolphins (*Stenella attenuata*), two species with historically high  
26 mortality due to bycatch in the eastern tropical Pacific yellowfin tuna fishery. However,  
27 there has been low statistical power in tests for genetic differentiation among most of  
28 these stocks, due to large historical abundances, ongoing gene flow, and recent  
29 divergence. We tested for structure at multiple hierarchical levels by collecting whole  
30 mitochondrial genome sequences (mtDNA) and nuclear SNPs (nuDNA) from 104  
31 spinner and 76 spotted dolphins using capture array library enrichment and highly  
32 paralleled DNA sequencing. MtDNA showed weak but significant differences between  
33 subspecies of spotted ( $F_{ST}$ : 0.0125;  $P = 0.0402$ ) and spinner dolphins ( $F_{ST}$ : 0.0133;  $P =$   
34 0.034). NuDNA supported subspecies of spotted but not spinner dolphins. Relatively  
35 strong and significant differentiation was detected between whitebelly and eastern  
36 spinner stocks using nuDNA ( $F_{ST}$ : 0.0297;  $P = 0.0059$ ). Neither mtDNA nor nuDNA  
37 supported the division of existing offshore stocks of spotted dolphins or Tres Marias  
38 spinner dolphins. This work identifies a genetic basis for biologically meaningful  
39 management units of these two species, a critical component in understanding their  
40 response in the face of historical and continued fishery interactions.

41 **Introduction:**

42

43 The study of population structure in pelagic organisms is inherently challenging. Their  
44 open ocean habitats have few permanent physical barriers to gene flow, thus  
45 demographic processes (*e.g.*, range expansion and metapopulation dynamics; Horne  
46 2014) may be more important in structuring populations than physical separation (Norris  
47 2000). In genetic terms, the dynamic nature of this environment increases the likelihood  
48 of mixing between populations; even a few successful migrants per generation greatly  
49 decrease the signal of population segregation (Waples 1998).

50

51 Moreover, pelagic populations often have large abundances, which can result in a large  
52 amount of standing genetic variation (Norris 2000). High genetic diversity can  
53 dramatically increase the time needed for populations to drift apart genetically, even in  
54 the complete absence of gene flow (Taylor and Dizon 1996).

55

56 With large abundance and weak barriers, pelagic species provide challenges for using  
57 genetic tools to determine population structure (Taylor and Dizon 1996, Waples 1998).  
58 Spinner and spotted dolphins in the eastern tropical Pacific Ocean (ETP) typify this  
59 problem and present an excellent opportunity to describe population genetic  
60 differentiation at multiple levels (stocks, subspecies, global populations).

61

62 These two species historically numbered several million (Wade *et al.* 2007), but starting  
63 in the 1960s, hundreds of thousands were killed annually as bycatch in the dolphin-set  
64 tuna purse-seine fishery (Lo and Smith 1986, National Research Council 1992, Wade  
65 1995) because both species commonly associate with one-another and with large tuna  
66 (see Scott *et al.* 2012 for details). Despite over forty years of protection under the U.S.

67 Marine Mammal Protection Act of 1972 and specific multi-national protection under the  
68 1999 Agreement on the International Dolphin Conservation Program (Joseph 1994,  
69 Gosliner 1999), ETP spinner and spotted dolphin populations have not recovered as  
70 expected (Wade *et al.* 2007, Gerrodette *et al.* 2008). Previous genetic studies have shown  
71 that these species retain a large amount of genetic variation (Dizon *et al.* 1994, Galver  
72 2002, Escorza-Treviño *et al.* 2005, Andrews *et al.* 2013), which possibly obscures the  
73 detection of population genetic structure that could be used to improve recovery efforts.  
74 These species exhibit intraspecific morphometric differences supporting structured  
75 populations (Perrin *et al.* 1991, 1994). Some molecular genetics approaches have not  
76 found corresponding population genetic structure (Dizon *et al.* 1994, Galver 2002),  
77 although Andrews *et al.* (2013) found evidence for segregation in ETP spinner dolphins  
78 based on data from the Y-chromosome and Escorza-Treviño *et al.* (2005) found  
79 population structure within the coastal subspecies of spotted dolphins based on  
80 microsatellites.

81

## 82 **Endemic spinner dolphin subspecies and stocks**

83

84 There are four recognized subspecies of spinner dolphin (*Stenella longirostris*) globally.  
85 The nominate form, the pantropical or "Gray's" spinner (*S. l. longirostris*) occurs  
86 throughout the tropical waters of the world. In the central and western Pacific, Gray's  
87 spinners are found associated with islands, such as the Hawai'ian Islands. The much  
88 smaller dwarf spinner (*S. l. roseiventris*) subspecies inhabits shallow waters of Southeast  
89 Asia (Perrin *et al.* 1989, 1999). The other two subspecies, Central American spinner  
90 dolphin (*S. l. centroamericana*) and the eastern spinner dolphin (*Stenella longirostris*  
91 *orientalis*) are found only in the ETP (Fig. 1, based on Perrin 1985), and were described  
92 based on differences in external coloration, body size, and skull morphology (Perrin *et al.*

93 1991, Douglas *et al.* 1992).

94

95 For management purposes, ETP spinner dolphin stocks correspond to the two

96 aforementioned endemic subspecies, plus the whitebelly spinners. The Central American

97 subspecies inhabits relatively near-shore waters off the Pacific coasts of Southern Mexico

98 south through Panama

99

100 The eastern spinner dolphin (*S. l. orientalis*) exhibits traits indicative of a polygynous

101 mating system (Perrin and Henderson 1979, Perrin and Mesnick 2003). Perrin and

102 Mesnick (2003) found significant difference in testes size between the eastern subspecies

103 and the whitebelly form, indicating differing reproductive strategies and probably

104 different breeding behavior between the two types. Andrews *et al.* (2013) estimated high

105 levels of gene flow between subspecies in the ETP using autosomal and mitochondrial

106 genes and found a shared Y chromosome haplotype in the eastern and Central American

107 subspecies that was not found in Gray's or dwarf subspecies. Interestingly, this locus was

108 found to be polymorphic in whitebellies, supporting the hypothesis of introgression in

109 this form (Andrews *et al.* 2013). The authors proposed that sexual selection was driving

110 the divergence of spinner dolphins in the ETP. Finally, a distinct morphotype of the

111 eastern spinner dolphin, known as the "Tres Marias" spinner dolphin, has been described

112 from near the islands of the same name off the coast of Mexico. These were thought to be

113 a distinct type based on external body morphometrics (Perryman and Westlake 1998).

114

115 The "whitebelly" spinner is proposed to represent a hybrid swarm between the eastern

116 subspecies and the pantropical Gray's subspecies of the central and western Pacific

117 (Perrin *et al.* 1991). Taxonomically, it is classified as part of the nominate (Gray's)

118 subspecies *S. l. longirostris*. Significant geographic overlap exists between the eastern

119 subspecies and the whitebelly form (Perrin *et al.* 1985) (See Fig. 1).

120

121

## 122 **Endemic ETP spotted dolphin subspecies and stocks**

123

124 Extensive analyses of cranial morphology of pantropical spotted dolphins (*Stenella*

125 *attenuata*) in the ETP led to the designation of a coastal endemic subspecies (*S. a.*

126 *graffmani* - Perrin 1975, Perrin *et al.* 1987). Pantropical spotted dolphins in offshore

127 regions in the ETP and elsewhere retain the nominate trinomial, *S. a. attenuata*. In

128 contrast to the spinner dolphins, genetic analyses of microsatellites indicated some

129 differentiation between subspecies (Escorza-Treviño *et al.* 2005). This study identified at

130 least four demographically independent populations within the coastal subspecies (*S. a.*

131 *graffmani*) and differences between southern populations of the coastal subspecies and

132 the pelagic subspecies. However, they found no differences between the northern

133 populations of the coastal subspecies and the pelagic subspecies. The authors concluded

134 that genetic diversity in the coastal subspecies is contained within demographically

135 independent populations and that interchange is ongoing between northern populations

136 and the pelagic subspecies. Tests for population genetic structure within the pelagic

137 subspecies have not been conducted.

138

139 Despite the results of Escorza-Treviño *et al.* (2005) the entire coastal subspecies is

140 currently treated as a single management stock. The offshore pantropical spotted dolphins

141 are divided into a ‘northeastern’ (NE) stock, defined geographically as north of 5°N, east

142 of 120°W and a ‘western-southern’ (WS) stock residing south and west of this

143 northeastern area (Fig. 2) (Perrin *et al.* 1994). The north-south boundary between these

144 stocks is based on a distributional hiatus around 5°N. General similarity in gross external

145 and cranial morphology supports a unified WS stock (see Perrin *et al.* 1994 for discussion  
146 and primary references), but genetic information has never been collected and compared  
147 for these two areas (western offshore and southern offshore).

148

149

## 150 **Objectives**

151 Spinner and spotted dolphins offer a unique opportunity to test for genetic differentiation  
152 at multiple taxonomic levels in two species with large population sizes, documented  
153 morphological differentiation, and access to tissue specimens collected *in situ* from  
154 remote pelagic regions. In this study, we apply population genetic structure analyses of  
155 whole mitochondrial genomes (mitogenomes), individual gene regions within the  
156 mitogenomes, and nuclear single nucleotide polymorphisms (SNPs) to test subspecies  
157 hypotheses and levels of differentiation between recognized and proposed management  
158 stocks, including the Tres Marias spinner dolphin and alternative stock boundaries in the  
159 offshore spotted dolphins. Testing the same hypotheses of genetic structure using new  
160 methods may seem redundant, but it is our hypothesis that previous genetic studies have  
161 lacked statistical power to detect structure. To overcome the limitations of using few  
162 genetic markers in highly abundant and genetically variable populations, we have  
163 expanded the genetic analyses to include mitochondrial genomes and sets of 51 (spinner)  
164 and 36 (spotted) nuclear SNP loci. Although still only representing a single maternally-  
165 inherited marker, our mitogenome data adds additional information to help differentiate  
166 populations based on molecular divergence (as calculated using  $\Phi_{ST}$ ) beyond that of the  
167 two mtDNA genes studied by Andrews *et al.* (2013) and the single mtDNA gene of  
168 Escorza-Treviño *et al.* (2005). Morin *et al.* (2012) found that a data set of 42 SNPs had  
169 similar statistical power for population genetics to that of approximately 22 microsatellite  
170 loci. Using this ratio, our 51 nuclear SNPs for spinner dolphins resulted in a data set

171 comparable to roughly 27 microsatellites. Therefore, if statistical power scales linearly  
172 with the number of loci, our data are expected to be over twice as powerful as the  
173 previous microsatellite data sets for spinner dolphins (12 loci; Galver *et al.* 2002). The 36  
174 SNP data set for spotted dolphins that resulted from this work is expected to be two to  
175 three times more powerful than the previous nuDNA data set (7 microsatellite loci;  
176 Escorza-Treviño *et al.* 2005).

177

178

## 179 **METHODS**

180

### 181 **Sample Collection and DNA extraction**

182 Skin samples were collected from 104 spinner dolphins and 76 spotted dolphins *via*  
183 biopsy dart (Lambertsen 1987) on research cruises or from specimens taken as bycatch in  
184 the tuna purse-seine fishery between 1982 and 2010 (Fig. 1, 2; Supplementary Material  
185 Tables S1, S2). On research cruises it is relatively common to see some fraction of  
186 spinner dolphins of alternate morphology (*i.e.*, possibly different subspecies) within a  
187 school of spinner dolphins comprised mostly of another morphotype/subspecies. For this  
188 reason, spinner dolphin samples collected from research cruises were assigned to a stock  
189 based on the external morphology of the majority of animals in the school rather than the  
190 morphology of the individual sampled or the geographic location of the school. This  
191 approach was taken because: 1) only after observing the group (which could contain >  
192 1,000 individuals) for some time could observers classify it to stock, 2) researchers  
193 collecting biopsies from dolphins near the bow of the research vessel found it very  
194 difficult to confidently classify fast-swimming individuals at sea, and 3) there is  
195 significant overlap in range; therefore, geography was not a reliable predictor of stock  
196 identity. Some samples were used from areas where the eastern and whitebelly spinners



197 are known to geographically overlap (see Figure 1). Spinner dolphin samples from  
198 Hawai‘i spanned the breadth of the main islands and also Midway Atoll.  
199  
200 Spotted dolphins were assigned to subspecies and stocks based on the geographic  
201 location of the sampling site. To avoid misassigned individuals near the borders of the  
202 NE and WS offshore stocks, we did not use samples collected between 4°N and 6°N east  
203 of 125°W. Hawai‘ian spotted dolphin samples were collected from the Kona Coast of  
204 Hawai‘i and O‘ahu.

205  
206 Biopsy samples were stored in salt-saturated 20% DMSO, 70% ethanol, or frozen with no  
207 preservative. DNA was extracted using silica-based filter membranes (Qiagen, Valencia,  
208 CA) on an automated workstation (Perkin Elmer, Waltham, MA). Starting concentrations  
209 of DNA were quantified using Pico-Green fluorescence assays (Quant-it Kit, Invitrogen,  
210 Carlsbad, CA) using a Tecan Genios microplate reader (Tecan Group Ltd, Switzerland).

211

## 212 **Library Preparation and Sequencing**

213 Next-generation sequencing libraries were generated as described by Hancock-Hanser *et*  
214 *al.* (2013), using unique 6bp and 7bp index sequences for each individual to allow up to  
215 100 samples to be multiplexed. Multiplexed libraries were enriched for whole  
216 mitogenomes and 85 nuclear loci using Sure Select DNA Capture Arrays (Agilent  
217 Technologies, Inc., Santa Clara, CA, USA) as described by Hancock-Hanser *et al.*  
218 (2013). Target sequences for capture enrichment included the reference pantropical  
219 spotted dolphin mitochondrial genome (Genbank No. EU557096; Xiong *et al.* 2009) and  
220 a suite of 85 nuclear loci (Supplementary Material Table S3). Autosomal and sex-linked  
221 conserved anchor tag loci (CATS; Lyons *et al.* 1997; Aitken *et al.* 2004) made up the  
222 bulk of the nuclear loci (n=75; Supplementary Table S1 from Hancock-Hanser *et al.*

223 2013). In addition, one Y-chromosome locus (SRY Genbank No. AB275398.1) and nine  
224 nuclear exons involved in vertebrate coloration were also included (Rieder *et al.* 2001,  
225 Hoekstra *et al.* 2006, Eriksson *et al.* 2008, Hubbard *et al.* 2010). Coloration loci and the  
226 Y-chromosome locus were aligned to the common bottlenose dolphin (*Tursiops*  
227 *truncatus*) genome (ENSEMBL v. 61) (See Table S3 for locus details) and common  
228 bottlenose dolphin sequences (sequences in Supplemental Table S4) were used in the  
229 capture array design with the eArray software package (Agilent Technologies, Inc., Santa  
230 Clara, CA, USA). Three identical arrays were used to capture a multiplexed mix of both  
231 species. Each array contained one replicate of the mitogenome probes at a probe interval  
232 of 15bp as well as 13 replicates of probes for the nuclear loci at a probe interval of 3bp.  
233 Each enriched library was then sequenced using 1X100bp Illumina HiSeq technology  
234 (two using Illumina HiSeq2000 and one using HiSeq2500).

235

### 236 **Mitogenome Assembly**

237 Raw read data were filtered for quality (minimum quality score of 15) and demultiplexed  
238 by unique barcode. Consensus sequences for each sample were generated from  
239 mitogenome sequence reads using a custom pipeline (Dryad data repository  
240 doi:10.5061/dryad.cv35b) in R v2.15.0 (R Core Team, 2014). Reads were first mapped to  
241 the reference spotted dolphin sequence with the short-read alignment tool BWA (Li and  
242 Durbin, 2009). The mpileup module in SAMTOOLS (Li *et al.* 2009) was then used to  
243 convert the resulting BAM-format alignment file into a ‘‘pileup’’ text format, which was  
244 then parsed by custom R code to create the consensus sequence for each individual. The  
245 following rules were used in this process: A ‘‘N’’ was inserted at a position if the  
246 assembly had <3 reads, <5 reads where not all contained the same nucleotide, or >5 reads  
247 where no one nucleotide (*i.e.*, A, C, G, T) was present in >70% of the reads. All  
248 mitogenome sequences were initially aligned with MAFFT using the automatic selection

249 of an appropriate handling strategy (“auto”) and default parameters (Katoch *et al.* 2009)

250 followed by a refinement of alignments by eye.

251

## 252 **NuDNA SNP Discovery and Genotyping**

253 Using CLC Genomics Workbench v3.7 (CLC Bio, Aarhus Denmark), all sequence data

254 were first mapped to the mitogenome references and unmapped reads were saved. We

255 then created species-specific *de novo* references for nuDNA loci by combining reads

256 from a subset of five individuals – representing various stocks - with the highest number

257 of the unmapped reads. *De novo* contigs were aligned back to original nuDNA capture

258 sequences prior to mapping reads from all animals to the *de novo* reference. For loci that

259 did not assemble into *de novo* species-specific references, we used the original reference

260 sequence used in the capture array assembly. Additional flanking sequence was often

261 added with the *de novo* references relative to the original capture sequences.

262

263 All reads were assembled to the *de novo* nuDNA references with the same initial criteria

264 outlined above for the mtDNA with one exception. Because we assembled reads from

265 multiple individuals we did not employ the rule regarding the insertion of N’s at positions

266 with >5 reads where no one nucleotide was present in >70%. Putative SNPs were

267 discovered using MPILEUP and variant calling tools from GATK (McKenna *et al.* 2009).

268 We considered variable sites in nuclear loci to be potential SNPs if the population

269 samples contained heterozygotes and/or homozygotes of the minor allele with at least 7

270 reads for called genotypes, and the minor allele frequency was  $\geq 5\%$  frequency in the

271 sample set. Putative SNPs were screened for validation by examining BAM alignments

272 by eye. We did not choose a SNP if it had Ns or other ambiguities in the flanking regions

273 or if the SNP was found in <5 individuals.

274

## 275 **Diversity Estimates and Population Structure Analyses**

276 Two mitogenome data sets were created for each species. First, we partitioned each  
277 species' data set into one of fifteen loci (12 coding sequences, the control region and 2  
278 rRNA genes). ND6 and tRNA loci were removed prior to analyses because they conform  
279 to different evolutionary models and ND6 falls on the opposite strand from the remaining  
280 genes (Duchene *et al.* 2011). Sequences were aligned to the pantropical spotted dolphin  
281 reference and locus start/stop positions were annotated in GENEIOUS v5.4 (Biomatters  
282 Limited) using the GENEIOUS alignment tool and the amino acid translation tool,  
283 respectively.

284

285 Second, we removed the control region because of high variation in this region and  
286 concatenated the remaining 14 regions to make the concatenated mitogenome sequences.  
287 The final sequence lengths for the concatenated data were 13,426bp and 13,425bp for  
288 spinner and spotted dolphins, respectively. An individual was removed entirely from  
289 analyses if it contained >10% missing data across the entire concatenated sequence.

290

291 For both data sets, we estimated haplotypic diversity ( $h$ , Nei 1987) and nucleotide  
292 diversity ( $\pi$ , Tajima 1983), and assigned individual genes and whole mitochondrial  
293 genome sequences to unique haplotypes using tools from the *strataG* package in R (v.  
294 2.3.1; Archer *et al.* 2016). Two pairwise estimates of population genetic structure,  $F_{ST}$   
295 (Wright 1949),  $\Phi_{ST}$  (Excoffier *et al.* 1992), were also performed using the *strataG*  
296 package. The significance of each estimate was tested using 5000 non-parametric random  
297 permutations of the data matrix variables. For  $\Phi_{ST}$ , pairwise distances were calculated  
298 using the best substitution model as identified by Akaike's Information Criterion in  
299 JModelTest version 2.1.4 (Posada 2008). Models were determined for individual gene  
300 regions and the entire concatenated dataset.

301

302 We performed a substitution rate test on each species' mitogenome data set to determine  
303 if mutations had reached a point of saturation. For this test, we generated pairwise percent  
304 differentiation and plotted this against a Jukes and Cantor (1969) correction factor  
305 generated using MEGA 5.2.2 (Tamura *et al.* 2011). We chose this model because of its  
306 simplicity; if deviations were seen here then general saturation could be assumed.

307

308 Although mitochondrial loci are assumed to be under purifying selection (Stewart *et al.*  
309 2008) we, nonetheless, tested spinner dolphin mitochondrial genes for evidence of  
310 positive selection using both Tajima's *D* and Codon-based *Z*-Test as implemented in  
311 MEGA 5.2.2 (Tamura *et al.* 2011).

312

### 313 **Nuclear Population Structure Analyses**

314 Individuals with >50% of genotypes present and loci with >30% of genotypes present in  
315 the total data set were analyzed for population structure. Only the first SNP was chosen  
316 from each region sequenced to minimize issues with linkage and phasing. We then  
317 calculated pairwise  $F_{ST}$  differentiation statistics (Wright 1949) using the *strataG* package  
318 in R (Archer *et al.* 2016). Meirmans and Hedrick (2011) show that the classic  $F_{ST}$  is  
319 appropriate for biallelic SNP data, and do not recommend calculating standardized  
320 measures.

321

322 To test if SNPs associated with Y-chromosome or coloration genes contributed  
323 disproportionately to the overall patterns of population structure found using our spinner  
324 dolphin SNP data set, we conducted simulation-based  $F_{ST}$  outlier tests for selection at  
325 each locus in the selection-detection workbench *Lositan* (Antao *et al.* 2008). Using all  
326 SNPs and partitioning the samples into three putative populations (whitebelly, eastern

327 and Central American) we used *Lositan* to run 75,000 FDIST2 simulations (Beaumont  
328 and Nichols 1996), first calculating neutral  $F_{ST}$  (*i.e.*, removing all putative  $F_{ST}$  outliers)  
329 and then approximating a mean overall  $F_{ST}$  using bisection approximation algorithms  
330 (Antao *et al.* 2008). We chose an infinite alleles model for all simulations. All population  
331 differentiation statistics were calculated again with  $F_{ST}$  outliers removed.

332

### 333 **Bayesian Clustering**

334 A Bayesian clustering method implemented in STRUCTURE v 2.3.4 (Pritchard *et al.*  
335 2000, Hubisz *et al.* 2009) was used to identify the number of populations ( $K$ ) represented  
336 in the SNP data sets. Prior information on the origin of the samples (subspecies and  
337 geographically defined groups within subspecies) was combined with a correlated allele  
338 frequency model and an admixture model for these analyses. Data were also analyzed  
339 without location priors using the same models. We evaluated values of  $K$  between 1 and 5.  
340 For each assumed value of  $K$ , 20 independent runs were conducted. Total length of the  
341 run was set at 1,000,000 and burn-in was set at 100,000. The most likely estimate of  $K$   
342 was determined by the maximum estimated mean log-likelihood of the data ( $\ln P(D)$ )  
343 (Pritchard *et al.* 2000) and by calculating  $\Delta K$ , the second-order rate of change of  $\ln P(D)$   
344 with respect to the  $K$  (Evanno *et al.* 2005).

345

346

### 347 **RESULTS:**

348

349 Hancock-Hanser *et al.* (2013) present information on the success rate of the DNA capture  
350 method including summary statistics of the data analyzed in this paper. As it relates to  
351 our analyses, questions might arise about how using arrays designed from closely-related  
352 species affected our results. As presented in Tables 4 and 5 of Hancock-Hanser *et al.*

353 (2013), spinner dolphin samples had slightly higher number of mtDNA reads per  
354 individual than spotted dolphin samples, despite use of the spotted dolphin mitogenome  
355 as the capture bait. The same pattern was found for the nuDNA capture – spinner  
356 dolphins had more reads per individual than spotted dolphins - despite all the baits being  
357 common bottlenose DNA sequence. We interpreted this consistency as an indication that  
358 inter-specific capture worked well and that any decrease in capture success (as evidenced  
359 in reads per individual for a given species) was more likely due to a combination of other  
360 factors (sample quality, multiplexing rate, sequencing technology, and/or variation in  
361 library preparation) rather than reduced capture due to inter-specific baits. The one area  
362 that might have been an issue for inter-specific capture was the hyper-variable section of  
363 the control region (see below).

364

### 365 **Spinner dolphins**

366

### 367 **Mitogenomes**

368 We assembled 104 complete or nearly complete (<10% missing data) concatenated  
369 spinner dolphin mtDNA data sets. The hyper-variable section of the control region had  
370 consistently lower coverage in many individuals and was removed from the concatenated  
371 data set (Supplementary Table S1). Subspecies and regional sample sizes, summary  
372 statistics and genetic diversity measures are listed in Table 1. At the subspecies level,  
373 haplotypic diversities were high and nucleotide diversity was low ( $>0.9722$ ,  $<0.0073$ ,  
374 respectively). The substitution rate test did not show any signs of saturation. The best  
375 nucleotide substitution model estimated by JModelTest (Posada, 2008) was JC69 (Jukes  
376 and Cantor 1969) for all individual gene regions and the entire concatenated data set. The  
377 results of  $F_{ST}$  and  $\Phi_{ST}$  analyses of the mtDNA concatenated genes and  $\Phi_{ST}$  of the

378 individual gene regions for spinner dolphins are shown in Table 2. Due to space  
379 limitations, we only discuss  $\Phi_{ST}$  for the partitioned gene region analyses.  
380  
381 At the subspecies level, the  $\Phi_{ST}$  test showed no differentiation between Central American  
382 spinners and eastern spinner dolphin subspecies in either the concatenated or partitioned  
383 data sets.  $F_{ST}$  was significant in the concatenated data set (0.0133,  $P = 0.034$ ).  $\Phi_{ST}$   
384 comparisons of the whitebelly form and coastal Central American subspecies showed  
385 nearly significant differentiation in the concatenated data set ( $\Phi_{ST} = 0.0490$ ;  $P = 0.0542$ )  
386 and seven individual gene regions. ND3 showed a significant difference at  $P = 0.0054$ ,  
387 while all other significant comparisons between these strata were at  $P < 0.05$  (Table 2).  
388  
389 We found no significant differences between the whitebelly and the eastern subspecies  
390 using the concatenated mitogenome data ( $\Phi_{ST} = 0.0181$ ;  $P = 0.0741$ ). However, eight  
391 individual mitochondrial genes showed significant differentiation. All individual gene  
392 partitions in spinner dolphins were found to be under purifying selection using Tajima's  
393  $D$  tests for selection (Table S5) and Z-Test for positive selection using the Nei-Gojobori  
394 method (Nei and Gojobori 1986) (Table S6).  
395  
396  $\Phi_{ST}$  tests showed no differentiation between Tres Marias spinners and either ETP spinner  
397 dolphin subspecies in either the concatenated or partitioned data sets. Four individual  
398 gene regions were significantly different in the pairwise comparisons of Tres Marias and  
399 whitebelly spinner dolphins ( $P < 0.05$ ; ND3 at  $P < 0.01$ ). All tests involving  
400 comparisons with Hawai'ian spinner dolphins (*S. l. longirostris*) - using the concatenated  
401 data set - were highly significant.  
402  
403 Four genes showed population structure (significant  $\Phi_{ST}$ ) in all pairwise comparisons



404 between Hawai‘i and ETP groups (*i.e.*, Central America, Tres Marias, eastern, and  
405 whitebelly spinner), but not in any pairwise comparisons between these ETP groups: 16S,  
406 ATP6, ND2, and ND5. Because of the low abundance and geographic isolation of the  
407 Hawai‘ian population, we presume these genetic differences between Hawai‘i and the  
408 ETP groups resulted from drift. 16S had 24 haplotypes total, but only 4 haplotypes  
409 among all 15 Hawai‘ian samples. ATP6 had many more haplotypes in total (53), but  
410 again reduced diversity in Hawai‘i (5). One of these Hawai‘ian haplotypes was common  
411 among all ETP groups, and two were exclusive to Hawai‘i. The final two Hawai‘ian  
412 ATP6 haplotypes were shared with one ETP spinner dolphin each. ND2 also had 53  
413 haplotypes total, but only 4 spread among the 15 Hawai‘ian samples. Twelve samples  
414 from Hawai‘i had two haplotypes that were not shared with ETP populations. One  
415 individual shared a haplotype with an eastern spinner dolphin, the other two haplotypes  
416 were single samples unique to Hawai‘i. Finally, ND5 had 70 total haplotypes, but only 5  
417 among the Hawai‘ian samples – none of which were shared with ETP populations.

418

419

#### 420 **Nuclear SNPs**

421 Compared to the mitogenome NGS data, coverage for nuclear genes was low and highly  
422 variable. This was likely due to variation in sample quality. Samples were collected as far  
423 back as 30 years ago and as recently as ten years ago. Older fisheries-collected samples  
424 were stored in saturated salt and DMSO solution for many years at room temperature. In  
425 spinner dolphins, 51 SNP loci were compared across 56 samples. These data included  
426 SNPs from six coloration genes, one Y-chromosome marker (UBE1) and 44 CATS loci.  
427  $F_{ST}$  outlier analysis indicated that four were under positive selection and five were under  
428 balancing selection (Supplemental Material Fig. S1). Once these were removed the

429 neutral data set included 42 SNPs: five coloration SNPs, one Y-chromosome and 36  
430 CATS loci (See Supplemental Material Table S7 for details).  
431  
432 We had sufficient genotypes at the 51 SNPs for pairwise comparisons involving the ETP  
433 subspecies and the whitebelly spinner, but not the putative Tres Marias stock. Divergence  
434 metrics based on genotypes from all loci - and all neutral loci - are shown in Table 3.  
435 Comparing Central American and both whitebelly and eastern spinners,  $F_{ST}$  showed no  
436 significant differentiation. However, between eastern and whitebelly spinner dolphins,  
437  $F_{ST}$  was significantly different ( $p < 0.01$ ).  
438  
439 Analyses of Bayesian clustering in STRUCTURE estimated the most likely number of  
440 unique clusters for spinner dolphins was  $K=1$  based on  $LnP(K)$ . Using the metric  $\Delta K$   
441 (Evanno *et al.* 2005),  $K=2$  was the most likely number of clusters estimated (see  
442 Supplemental Material Fig. S2A); however,  $\Delta K$  cannot evaluate  $K=1$ , so  $K=2$  is the  
443 smallest value  $\Delta K$  can estimate. Moreover, there is no obvious biological pattern to  
444 correspond to  $K=2$  as every individual was assigned nearly 50:50 to each of the 2 clusters  
445 (Supplemental Material Fig. S2B and C). These estimates were consistent regardless of  
446 whether location priors were used.  
447  
448 Four loci were estimated to be subject to positive selection in spinner dolphins: beta-  
449 carotene oxygenase 1 (BCDO), glucose transporter member 2-like gene (GLUT2),  
450 myeloperoxidase-like genes (MPO), and Wilm's tumor 1-like gene (WT1) (Supplemental  
451 Material Fig. S1). GLUT2 codes for cellular membrane transporters. MPO codes for a  
452 common enzyme in blood, and WT1 is involved in the development of the urogenital  
453 system in humans. In addition, five SNPs within the following loci were estimated to be  
454 under balancing selection: COL10A, GLB79, LAPTM4A, NPPA, RHO.

455

## 456 **Spotted dolphins**

457

## 458 **Mitogenomes**

459 We assembled 76 complete or nearly complete (<10% missing data) spotted dolphin  
460 mitogenomes. Sample sizes, summary statistics and genetic diversity measures are listed  
461 in Table 1 (Supplementary Table S2 will include GenBank accession numbers). At the  
462 level of subspecies, nucleotide diversity was higher in spotted dolphins (>0.0162) than  
463 spinner dolphins. Haplotypic diversity ( $h$ ) is high in both species (>0.9529), but ETP  
464 spotted dolphins subspecies have slightly lower levels (0.9529 and 0.9804 for the coastal  
465 and offshore groups, respectively) than spinner dolphin subspecies (0.9722 and 0.9985)  
466 in this region. The coastal ETP subspecies for both spinner and pantropical spotted  
467 dolphins in the ETP show reduced  $h$  compared to their offshore ETP counterparts (Table  
468 1). Similar to the spinner dolphin mitogenome data, the substitution rate test did not  
469 detect any signs of saturation, and JModelTest (Posada, 2008) was JC69 (Jukes and  
470 Cantor 1969) as the best substitution model for all individual gene regions and the entire  
471 concatenated data set.

472

473 Results of  $F_{ST}$  and  $\Phi_{ST}$  analyses of the mtDNA concatenated genes and  $\Phi_{ST}$  of the  
474 individual gene regions for spotted dolphins are presented in Table 4. Similar to the  
475 spinner dolphins, our analyses at the subspecies level for spotted dolphins (coastal *vs.*  
476 offshore) show no significant differentiation using  $\Phi_{ST}$  for the concatenated or partitioned  
477 data sets.  $F_{ST}$  was significant in the concatenated data set (0.0125,  $P = 0.0402$ ).

478

479 Estimates of differentiation between the current management stocks within the offshore  
480 subspecies (NE and WS stocks) using the whole mitogenome data and individual mtDNA

481 genes showed no differences. Using  $\Phi_{ST}$ , no significant differences were observed  
482 between the coastal subspecies and the NE offshore stock, however  $F_{ST}$  (0.0302) was  
483 highly significant at  $P = 0.0002$ ] between these management units. Similarly,  $\Phi_{ST}$  was  
484 not significant for pairwise comparisons of the Coastal subspecies and WS offshore stock  
485 using the concatenated data or individual genes.

486

487 Within the WS offshore stock, we found nearly significant differences between the  
488 southern and western offshore regions using the concatenated mitogenome using  $\Phi_{ST}$   
489 estimates ( $\Phi_{ST} = 0.1666$ ;  $P = 0.0668$ ). One individual mtDNA gene (ND4) had  
490 significant differentiation ( $p < 0.05$ ) and three others had nearly significant p-values (16S,  
491 ND1, ND5).

492

493 Comparing separate western and southern portions of the WS stock to other partitions  
494 using the mitogenome data set also yielded no significant  $\Phi_{ST}$  estimates. Our comparison  
495 of the NE stock to the western portion of the WS stock, however, was nearly significant  
496 using the concatenated mitogenome ( $\Phi_{ST} = 0.1135$ ;  $P = 0.0517$ ) and four individual  
497 mtDNA genes showed significant  $\Phi_{ST}$  differences ( $p < 0.05$ ). Neither data set showed  
498 significant differences between the NE stock and the southern portion of the WS stock for  
499 either statistic.

500

501 Comparison of the coastal subspecies to just the southern portion of the WS stock  
502 resulted in no significant  $F_{ST}$  or  $\Phi_{ST}$  difference in the concatenated data set or individual  
503 gene regions. Between the coastal subspecies and western offshore portion of the WS  
504 stock, however, one individual gene region (ATP8) showed significant differentiation ( $P$   
505  $< 0.05$ ), and one (12S) showed nearly significant differentiation ( $P = 0.0559$ ). Ideally we  
506 would have partitioning the coastal subspecies south of central Mexico into the

507 population units described by Escorza-Triveño *et al.* (2005), but our smaller sample size  
508 prevented us from doing this.

509

510 Significant differentiation was detected between Hawai‘i and the coastal subspecies, and  
511 between Hawai‘i and offshore spotted dolphins, in  $F_{ST}$  and  $\Phi_{ST}$  of the concatenated data  
512 set. As expected, given this result, significant differentiation was detected in many  
513 individual mtDNA genes (see Table 4). We also detected significant differences between  
514 Hawai‘i and the NE stock in four genes, but not for the concatenated mtDNA data set  
515 (although it was nearly significant for  $\Phi_{ST}$  at  $P = 0.0645$ ). Hawai‘i and the WS stock  
516 were significantly different in the concatenated data set using  $\Phi_{ST}$ , and in nine individual  
517 genes ( $P < 0.05$ ).

518

519 Finally, we also tested hypotheses of differences between Hawai‘i and divided western  
520 and southern portions of the WS stock. Hawai‘i and the western portion were  
521 differentiated using the concatenated dataset ( $\Phi_{ST}: 0.4932$ ;  $P = 0.0645$ ). Ten individual  
522 genes showed differentiation between these two strata (see Table 4). Hawai‘i and the  
523 southern portion of the WS stock were not differentiated based on our concatenated data  
524 sets, but did show significant differentiation in five individual genes ( $P < 0.05$ ).

525

## 526 **Nuclear SNPs**

527 Similar to the spinner dolphin samples, coverage for nuclear genes was low and highly  
528 variable. For spotted dolphins, 25 samples had sufficient coverage at 36 loci to call SNP  
529 genotypes. These data enabled us to conduct pairwise comparisons between the  
530 subspecies, but insufficient samples with genotypes prevented us from conducting  
531 comparisons between the two stocks of the offshore subspecies. The 36 loci included four  
532 coloration genes and 32 CATS loci.  $F_{ST}$  outlier analysis estimated that six SNPs were

533 under positive selection and five were under balancing selection (Fig. S3). After  
534 removing these loci, the neutral data set included 25 SNPs – two from coloration genes  
535 and 23 from CATS loci (See Supplemental Material Table S8 for details).  
536  
537 Divergence metrics based on genotypes from all loci - and all neutral loci - are shown at  
538 the bottom of Table 3. For spotted dolphins, we detected significant differentiation  
539 between coastal spotted dolphins and offshore pantropical spotted dolphins in all three  
540 statistics ( $P = 0.001$ ). It is worth noting, however, that 12 of the 13 samples from the  
541 offshore partition were from the WS stock, a majority of which was sampled in the  
542 southern region. Unfortunately, we were unable to test for population structure between  
543 the offshore stocks (or other partitions proposed by Escorza-Treviño *et al.* 2005) because  
544 of too few samples and loci.  
545  
546 Analyses of Bayesian clustering in STRUCTURE using all SNPs estimated the most  
547 likely number of unique clusters for spotted dolphins was  $K=2$  based on  $LnP(K)$   
548 (Supplemental Fig. S4). Using the metric  $\Delta K$  (Evanno *et al.* 2005),  $K=2$  was the most  
549 likely number of clusters estimated for spotted dolphins (see Supplemental Material Fig.  
550 S4); however, as with the spinner dolphins,  $K=2$  is the smallest value  $\Delta K$  can estimate.  
551 These estimates were consistent regardless of whether location priors were used.  
552  
553 Six loci were estimated to be subject to positive selection in spotted dolphins: beta-  
554 carotene oxygenase 1 (BCDO), FES proto-oncogene, tyrosine kinase (FES), homeobox  
555 protein Hox-C8 (HOXC8), myosin heavy chain 4 (MYH4), somatostatin (SST) and  
556 tyrosinase-related protein 1 (TYRP1). BCDO produces a key enzyme in beta-carotene  
557 metabolism to vitamin A, which is a vital component in processes like vision,  
558 development, cell differentiation and skin color and protection. FES codes for tyrosine

559 kinase: an important component of cellular transformation. HOXC8 plays an important  
560 role in morphogenesis in mammals. MYH4 is involved in building motor proteins for  
561 muscle contraction. Somatostatin codes for the hormone of the same name, which is an  
562 important regulator of the endocrine system. TYRP1 encodes for an enzyme in  
563 melanocytes that produce melanin. In addition, five loci were estimated to be under  
564 balancing selection in this species: ADH, AMBP, CHRNA, ELN, FSHB.

565

## 566 **Discussion**

567

568 Spinner and spotted dolphins in the eastern tropical Pacific offer a unique opportunity to  
569 study genetic differentiation at multiple scales in species with high abundance and strong  
570 intraspecific morphological differences. But recent divergence, large population sizes,  
571 and ongoing gene flow likely contribute to low genetic divergence (Galver 2002,  
572 Escorza-Treviño *et al.* 2005, Andrews *et al.* 2013) and low statistical power to detect this  
573 divergence (Taylor and Dizon 1996, Waples 1998).

574

575 Using complete mitogenomes and sets of nuclear SNPs, we have provided genetic  
576 support for multiple levels of biologically meaningful differentiation among subspecies  
577 and populations of these two species of pelagic dolphins. However, as Table 5 shows,  
578 many of the comparisons lacked a consistent pattern across these markers. We believe  
579 this is useful information to report as it reflects the limitations of our data for finding  
580 population structure in this unique system, but also the unique information available  
581 through analysis of different markers and measures of differentiation. Our results show  
582 genetic support for endemic subspecies of spinner and spotted dolphins, although the  
583 strength of this support varies between markers. However, we did not find support for the

584 division of offshore stocks of spotted dolphins, nor did we find separation of the Tres  
585 Marias spinner dolphins as an independent population.  
586  
587  $F_{ST}$  and  $\Phi_{ST}$  provide slightly different perspectives on population differentiation and we  
588 believe it is important to present both measures. Our results show inconsistencies  
589 between these two metrics, which does not necessarily mean analytical problems or  
590 inaccuracies, but reflects something interesting about our data.  $F_{ST}$  tests for population  
591 differentiation are based on allele (or haplotype) frequencies and do not provide direct  
592 insights into levels of molecular divergence (Weir and Cockerham, 1984, Excoffier *et al.*  
593 1992, Meirmans and Hedrick 2011). In cases where haplotypes are similar within  
594 population and different between populations (such as those that would result via drift in  
595 small populations),  $F_{ST}$  is good at detecting frequency differences that indicate genetic  
596 structure. However, when haplotype diversity is high within and among populations, very  
597 large sample sizes are needed to characterize haplotype frequencies to detect differences  
598 using  $F_{ST}$ . In this situation,  $F_{ST}$  point values will be underestimated. Moreover, sampling  
599 effects can become important drivers of  $F_{ST}$  beyond the base frequency of alleles present  
600 and result in false positive results. We collected more sequence data to examine  
601 haplotypic similarities in other parts of the mitochondrial genome to help resolve close  
602 population relationships. One risk of adding more data is that the haplotype discovery  
603 curve never plateaus - more unique haplotypes are added thereby increasing the difficulty  
604 of characterizing haplotype frequencies among and between populations. Sequencing  
605 additional samples will help rectify this issue.  
606  
607  $\Phi_{ST}$  is certainly not immune to these issues of high heterozygosity, but  $\Phi_{ST}$  estimates  
608 capture more information regarding the differentiation due to sequence divergence (or  
609 nucleotide diversity) in addition to differences in haplotype frequencies. Although we



610 chose to focus the bulk of the discussion on  $\Phi_{ST}$ , we do report statistically significant  
611 measures of  $F_{ST}$  and briefly compare and contrast the two metrics. One down side of  
612 focusing on  $\Phi_{ST}$  (and another reason it is important to report  $F_{ST}$  as well) is that  $\Phi_{ST}$  may  
613 be more indicative of older, long-term processes, whereas  $F_{ST}$  can show recent  
614 differences among populations. In addition, given that the test for significance is  
615 determined by an arbitrary cut-off ( $P = 0.05$ ), we also present results that are “nearly  
616 significant”. Given the difficulty of distinguishing these groups in previous works, we felt  
617 it important not to focus too intensely on the arbitrary cut-off, but rather overall patterns  
618 of indicators.

619

620 The discordance we observed between the mtDNA and nuDNA markers (Table 5) could  
621 result from a number of factors. Despite the increase in power gained over other studies,  
622 it could be that our SNPs still do not have enough statistical power to detect differences  
623 in some cases because of recent divergence, continued low-level interbreeding, and/or  
624 high diversity and historical abundance. Differences in the rate of evolution in the two  
625 genomes (*i.e.*, mitogenome evolving faster than the nuDNA genome) could have resulted  
626 in more signal from drift appearing in allele frequencies due to the smaller  $N_e$  of the  
627 mitogenome (Moritz 1994). Alternatively, the discordance we observed could be a result  
628 of male-mediated exchange diluting the signal of structure in nuDNA or female site-  
629 fidelity increasing structure in the mtDNA. Although there is some evidence from  
630 tagging studies that some dolphins move substantial distances (Perrin *et al.* 1979), a  
631 thorough investigation into the differences between sexes is lacking. We believe it is  
632 therefore most likely that the SNP data set lacks statistical power, and suggest increasing  
633 the number of SNPs in future studies. Moreover, our sample sizes were low in some  
634 partitions ( $n=7$ ). This could result in the allele frequencies of populations being under-  
635 characterized, which could skew results in over- or under-classification. Efforts should be

636 made to collect more samples for future studies and efforts should be made to increase  
637 the number of SNP loci genotyped for each individual. Studies using simulations have  
638 shown that  $F_{ST}$  can be precise when using a small sample size (4-6) using >1,000 SNPs  
639 (Willing *et al.* 2012). Given the known evolutionary and demographic factors that could  
640 obscure population genetic structure in these species, and the relative difficulty in  
641 obtaining representative sample sets, we recommend targeting >1,000 SNPs for future  
642 studies. Of course, differences between groups will eventually be found as additional  
643 markers are added using hypothesis-testing methods (*i.e.*,  $P$ -values), even if the  
644 differences are not biologically meaningful. Conversely, non-significant results could  
645 occur with low levels of geneflow between strata that are demographically independent  
646 populations (Avice 1995; Taylor and Dizon 1996). Because management decisions rely  
647 on them, results must be interpreted within the context of all available information and  
648 with recognition of the caveats of the data used to generate them.

649

#### 650 **Endemic Spinner Dolphin Subspecies: Eastern and Central American**

651 No differences were detected between the two endemic subspecies using  $\Phi_{ST}$  on the  
652 concatenated spinner dolphin mitogenomic data set, but traditional  $F_{ST}$  was significantly  
653 different – supporting endemic subspecies distinction (Central American and eastern).  
654  $F_{ST}$  was very low as expected due to high abundance and haplotype diversity. The  
655 difference in these two metrics, on the same data set, results from  $\Phi_{ST}$  including  
656 differences in nucleotide divergence in the calculation; thus we conclude that haplotypes  
657 within these two subspecies are very similar, but that haplotype frequencies are  
658 significantly different. Nuclear SNP data did not support differences between these  
659 endemic subspecies, either with traditional F-statistics or Bayesian analysis in  
660 STRUCTURE. The lack of detectable structure could be because STRUCTURE's  
661 clustering algorithm attempts to maximize Hardy-Weinberg and linkage equilibrium

662 within clusters of samples. Data sets such as our spinner dolphin data, that represent a  
663 relatively small proportion of the overall variation of the true populations, have been  
664 shown to lack power to detect population clusters defined by Hardy-Weinberg and  
665 linkage (Kalinowsky 2010).

666

667 Despite the lack of population structure from our nuDNA SNP analyses, our results  
668 provide evidence of genetic differentiation between the accepted ETP endemic  
669 subspecies (Perrin *et al.* 1991) concordant with morphology and results from Andrews *et*  
670 *al.* (2013) who used data from the nuclear Actin gene. Differences in ecological,  
671 distributional, morphological, nuDNA, and now mtDNA data support the recognition of  
672 these distinct subspecies.

673

#### 674 **Whitebelly Spinner Dolphins**

675 Our comparisons involving the putative intergrade, the whitebelly spinner, also revealed  
676 discordant patterns between the mtDNA and nuDNA data sets (Table 5). Every  
677 whitebelly sample had a unique mitogenome haplotype, and as a result, frequency-based  
678 measures of differentiation such as *F*-statistics will be underestimated. Despite low point  
679 values, mitochondrial *F<sub>ST</sub>* and  $\Phi_{ST}$  estimates between the Central American and  
680 whitebelly forms were nearly significant, indicating possible separation. Nuclear SNP  
681 data, however, failed to show differences between these groups.

682

683 Although we used a slightly different set of samples from their study, Andrews *et al.*  
684 (2013) also found differentiation between Central American and whitebelly spinners  
685 using mtDNA genes (control region and *cytb*). We recovered the same pattern for those  
686 genes and several others (Table 2). Andrews *et al.* (2013) used a similar sample set to  
687 ours, but included 10 samples of Central American spinners that had questionable

688 subspecific identity (based on further investigation of the sample collection records at  
689 SWFSC by MSL). Samples were initially identified as Central American spinners, but the  
690 confidence in the identification was low and they should have been recorded as  
691 “unidentified”. These samples could have been eastern spinner dolphins. Unfortunately,  
692 our sample size was low for the Central American spinners after removal of these  
693 questionable samples (mtDNA:  $n=9$ ; nuDNA:  $n=7$ ), and we might not expect to find  
694 intraspecific structure with so few samples. The Central American subspecies, with lower  
695 relative abundance, might be expected to show higher levels of structure due to drift, and  
696 comparisons between this subspecies and the eastern subspecies showed evidence of  
697 weak structure based on allele frequencies.

698

699 Two explanations for the possible differentiation between Central American and  
700 whitebelly spinners in the mtDNA are isolation by distance and admixture between  
701 whitebellies and Hawai‘ian spinners. These are the two most geographically distant  
702 putative populations of ETP spinner dolphins; therefore, isolation by distance could  
703 contribute to population genetic structuring. Admixture between the whitebelly and  
704 Hawai‘ian spinners would bring novel genotypes from the Gray’s subspecies (Hawaii)  
705 into the whitebellies resulting in genetic structure.

706

707 Andrews *et al.* (2013) inferred high migration rates between whitebelly and eastern  
708 spinner dolphins (30.1 migrants per generation from whitebelly to eastern and 57.9  
709 migrants from eastern to whitebelly). Despite this high rate of migration, we detected  
710 weak differentiation. We found nearly significant differences between the whitebelly  
711 spinner and the eastern spinner using the concatenated mitogenome data, although the  
712  $\Phi_{ST}$  estimate was not significant ( $P = 0.0741$ ). We also saw significant differences  
713 between these strata in eight individual mtDNA genes.

714

715 Nuclear SNP data also showed significant differences between the eastern subspecies and  
716 the whitebelly intergrade. These results are concordant with phenotype and Y-  
717 chromosome differences (Andrews *et al.* 2013) where the most noticeable differences  
718 occur between the geographically overlapping whitebelly and eastern. We agree with  
719 these authors that there is likely a porous barrier to gene flow across the eastern Pacific  
720 basin, as mixed groups are common and interbreeding probably occurs with some  
721 regularity between eastern and Central American subspecies and between eastern and  
722 whitebelly spinners. However, we feel that this ‘introgression zone’ between whitebelly  
723 spinners and eastern spinners deserves further investigation. We hypothesize that either  
724 divergence with gene flow is ongoing in this area or the whitebelly spinner is the result of  
725 a recent reconnection in an area of historical separation across a known biogeographic  
726 boundary, the east Pacific basin.

727

728 Breeding biology and movement patterns could also affect the patterns we see between  
729 the whitebelly and eastern spinner dolphins. In particular, assortative mating can decrease  
730  $N_e$ , which could serve to amplify signal of structure in the nuDNA genome. The eastern  
731 spinner dolphin is thought to have a more polygynous mating system than the whitebelly  
732 form (Perrin and Mesnick, 2003). These authors concluded that relatively few males are  
733 involved with mating, serving to reduce  $N_e$  and potentially increase genetic structure  
734 (Perrin and Mesnick, 2003). Conversely, however, a skewed breeding system might also  
735 increase dispersal, as adult male dominance might promote movements of juvenile males  
736 which then become established breeder outside their natal range. Unfortunately, very  
737 little is known about the movement patterns of individual dolphins in the ETP, and less is  
738 known about differences in movement based on sex. High site fidelity in males could also  
739 restrict male-mediated geneflow between groups and increase relative signal in nuDNA

740 analyses.

741

742 The statistical power to estimate levels of migration between very large populations with  
743 low relative sample sizes is weak (Waples 1998, Taylor *et al.* 2000). For this reason, we  
744 did not estimate levels of migration for these data. Andrews *et al.* (2013) did estimate  
745 migration in ETP spinner dolphins and found lower, but significantly different from zero,  
746 rates of migration per generation between populations of Gray's (Hawai'ian and other  
747 Pacific Island groups) spinners and the whitebelly spinners (3.22 migrants per generation  
748 into Gray's and 1.6 into whitebelly spinners). The rate of migration into Gray's spinner  
749 populations from the eastern population was estimated to be less than one (0.82), but  
750 significantly different from zero. Although this was not a major focus of our study, the  
751 differences we detected between the Hawaiian population and the ETP pelagic  
752 populations were higher than any comparisons within the ETP, supporting the hypothesis  
753 that this is an insular population.

754

#### 755 **Alternative spinner dolphin stocks:**

756 We found no support for a Tres Marias population that differs from the eastern or Central  
757 American subspecies (*e.g.*, Perryman and Westlake 1998) using the concatenated or  
758 individual mitochondrial gene data sets. This is unsurprising given the weak genetic  
759 differences we found between the accepted endemic subspecies with much more marked  
760 morphological differences. We found statistically significant differences in four  
761 individual mtDNA genes when comparing the Tres Marias group to the whitebelly  
762 spinners and several nearly significant genes. Unfortunately, we were unable to test  
763 hypotheses that Tres Marias differs from other groups with the nuDNA due to small  
764 sample sizes. We do not feel confident making taxonomic recommendations for the "Tres  
765 Marias" spinners based on these analyses. Additional studies should approach this

766 question using larger sample sets and additional data.

767

768

769 **Spotted dolphin subspecies:**

770 Spotted dolphin mitogenomes have lower haplotypic diversity but higher nucleotide

771 diversity than spinner dolphins, despite extremely high historical population sizes in the

772 former. The two main reasons for lower haplotypic diversity could be a recent and/or

773 prolonged population bottleneck, such as the decrease caused by mortalities in the tuna

774 purse-seine fishery, or an extremely matrifocal social structure (Hoelzel *et al.* 2007).

775 Although matrifocal social structure is known in several species of odontocetes (*e.g.*,

776 killer whales and sperm whales), it is not a known characteristic of spotted dolphins, and

777 thus is an unlikely cause of low genetic diversity.

778

779 Similar to our findings for spinner dolphins, traditional  $F_{ST}$  calculated for the

780 mitogenome data set supports differentiation of the offshore *S. a. attenuata* and the

781 endemic coastal *S. a. graffmani* subspecies, whereas  $\Phi_{ST}$  failed to indicate any difference

782 - either for the entire genome or within any single gene. Our results show the NE stock

783 being strongly differentiated from the coastal subspecies (based on allele frequency

784 alone), counter to the results found by Escorza-Treviño *et al.* (2005) showing connection

785 between the NE stock and the coastal subspecies using seven microsatellite loci. In that

786 study, the authors inferred that there was a strong connection between the coastal and

787 offshore subspecies in northern Mexico. The differences between our results and those of

788 Escorza-Treviño *et al.* (2005) could be due to sampling; the previous study more samples

789 from the northern portion of the coastal spotted dolphin range than we did. Additionally,

790 the differences could be attributed to the unique evolutionary patterns of the different

791 markers examined in Escorza-Treviño *et al.* (2005) (*i.e.*, microsatellites) vs. the

792 mitogenomes used in our study.

793

794 In contrast to our results for spinner dolphin subspecies, our analyses of divergence using  
795 36 SNP loci showed highly significant differentiation between the two spotted dolphin  
796 subspecies based on traditional  $F$ -statistics and cluster analyses, supporting the  
797 hypothesis that two spotted dolphin subspecies exist in the ETP.

798

799 **Spotted dolphin stocks:**

800 A main objective of this work was to test for difference between existing (NE, WS, and  
801 Coastal) and proposed (independent W and S) management stocks. Using the whole  
802 mtDNA genome data set, we found no evidence for differentiation between the two  
803 current stocks (NE and WS). This could be because the two stocks are genetically  
804 connected or because our data lack power to detect differentiation at this fine scale. The  
805 large mtDNA found weak evidenced for splitting up the current WS stock - a high  $\Phi_{ST}$   
806 value (0.1666) and nearly significant ( $P = 0.0668$ ). Similarly, we detected nearly  
807 significant differences between the NE stock and the western group of the WS stock  
808 using the whole mtDNA genome. Four mtDNA loci had significant  $\Phi_{ST}$  estimates for this  
809 partition. The NE and the offshore southern group were not significantly different in any  
810 test, suggesting that the distributional hiatus at 5° north is not a barrier to gene flow. We  
811 cannot say with any certainty if this is the case, however, because of the low sample size  
812 for the southern portion of WS stock ( $n=9$ ); a larger sample size is necessary to  
813 convincingly investigate this hiatus. Overall, the whole concatenated mtDNA genome  
814 was not as useful as anticipated for delimiting stock structure, possibly because it  
815 introduced more variation (*via* novel haplotypes) into an already highly variable system.  
816 Whole mtDNA genomes have been useful for clarifying subspecific boundaries where  
817 information in single mtDNA genes has shown low variability (Archer *et al.* 2013, Morin



818 *et al.* 2010), including in this paper, but testing population-level boundaries in highly  
819 abundance cetaceans using mtDNA genomes may be less feasible.  
820  
821 The SNP data set indicated differences between the offshore and coastal spotted dolphin  
822 subspecies, but did not include data from individuals from the NE offshore stock of  
823 spotted dolphins. Therefore, this comparison includes animals from the most  
824 geographically separate portions of the offshore (WS) and coastal subspecies range.  
825 Additional nuclear data from the NE stock are needed to determine whether proximate  
826 populations of these two subspecies are also as genetically divergent.

827

828

#### 829 **Drift in mtDNA loci as indicated by comparisons with Hawai‘i**

830 Because of the greater divergence observed between Hawai‘ian and ETP populations of  
831 these two dolphins, we thought it would be informative to highlight genes showing  
832 structure (Hawai‘i vs. ETP), likely due to neutral drift acting on a small insular  
833 population, that might be useful for studying other Hawai‘ian populations of cetacean  
834 species. Four genes showed population structure (significant  $\Phi_{ST}$ ) in all pairwise  
835 comparisons between Hawai‘i and ETP groups (*i.e.*, Central America, Tres Marias,  
836 eastern, and whitebelly spinner), but not in any pairwise comparisons between these ETP  
837 groups: 16S, ATP6, ND2, and ND5. Because of the low abundance and geographic  
838 isolation of the Hawai‘ian population. We tested for positive selection in ETP spinner  
839 dolphin mitochondrial genes with significant  $\Phi_{ST}$  estimates. All of the mtDNA regions  
840 with significant  $\Phi_{ST}$  were found to be under purifying selection ((negative Tajima’s  $D$  -  
841 Table S5; and non-significant Z-tests – Table S6) indicating that the within-mitogenome  
842 differences are accumulating by neutral drift rather than via positive selection in ETP  
843 spinner dolphins. Significant differences between ETP groups and the Hawai‘ian insular

844 population of spotted dolphins were found in all but five of the mtDNA genes. We note  
845 however that the low sample sizes for Hawai‘ian spotted dolphins may explain some of  
846 the non-significant differences observed with respect to ETP stocks.

847

#### 848 **Positive Selection in ETP Spinner Dolphin mtDNA**

849 In general selection should affect linked loci equally. However, selection can act on  
850 individual mtDNA genes, such as in the case of cytochrome *b* in Antarctic killer whales  
851 (Foote *et al.* 2010). These authors posit that the positive selection measure is in response  
852 to need for increased metabolic performance for residence in cold waters. We tested for  
853 positive selection in spinner dolphin mitochondrial genes and found none. We did not test  
854 for positive selection in spotted dolphins because there was no existing hypothesis of  
855 positive selection, but moreover, because there were no individual mtDNA genes that  
856 supported differentiation between the two ETP subspecies.

857

#### 858 **NuDNA Loci Under Selection**

859 Although finding four of the 51 SNP loci (7.8%) in spinner dolphins and six of the 36  
860 SNP loci (16.7%) in spotted dolphins exhibiting evidence of positive selection was  
861 unexpected, similar results have been reported in other studies. Russello *et al.* (2011)  
862 found eight of their 52 loci (15.4%) to be outliers and useful for detecting ecotype  
863 divergence in Okanagan Lake kokanee (*Oncorhynchus nerka*). Bay and Palumbi (2014)  
864 found 2807 of 15399 SNPs (18.2%) to be  $F_{ST}$  outliers (before further filtering for  
865 analyses) in a population of tabletop corals. We removed all outlier loci (positive and  
866 balancing selection) for all population divergence statistics and the results remained the  
867 same as with all the data included (Table 3). The FDIST2 (Beaumont and Nichols 1996)  
868 method implemented in *Lositan* can be prone to false positives, although it generally  
869 performs better than ARLEQUIN (Excoffier and Lisher 2010) at minimizing type I error

870 when detecting  $F_{ST}$  outliers (Narum and Hess 2011).

871

872 We hypothesized that positive selection on nuclear loci coding for skin pigment

873 coloration could be contributing to the marked differences in coloration between the

874 forms of spinner dolphins in the ETP. Simulation-based tests for selection at each locus

875 using the program *Lositan* (Antao *et al.* 2008) found two coloration genes that were

876 subject to positive selection: BCDO and TYRP1. In both species, BCDO was under

877 positive selection, while spotted dolphins also exhibited positive selection in TYRP1.

878 Pairwise  $F_{ST}$  estimates were significantly different between coastal and offshore spotted

879 dolphin subspecies ( $P < 0.006$  for both loci) and between ETP endemic spinner dolphin

880 subspecies ( $P < 0.05$ ) (Table S9). Thus, these loci may be part of the molecular basis for

881 differences in coloration observed in this region for these species. Further analysis with

882 larger sample sizes will be needed to verify this finding.

883

884

## 885 **Conclusions:**

886

887 Defining population genetic structure is challenging for species with large historical

888 population sizes and high mobility. These populations can retain high genetic variation

889 even as abundance becomes relatively low, which could obscure signals of genetic

890 structure used to designate stock boundaries for estimating population abundance and

891 setting stock-specific mortality limits. Ultimately, without information on structure,

892 populations could be under-classified and unique evolutionary units and populations

893 could go extinct as we may fail to take appropriate conservation action. Alternatively,

894 there is a cost to managing populations as separate when there is no biological basis to do

895 so. Such errors can have economic, social, and political consequences resulting from

896 unnecessary restrictions on human activity. Furthermore, a consistent pattern of these  
897 errors will “stiffen the resolve of skeptics and make it difficult to accomplish sound  
898 resource management in the future” (Waples 1998).

899

900 This unique system of two delphinids, with available samples collected *in situ* from  
901 remote offshore environments encompassing extensive geographic and morphological  
902 variation, was used to test for population genetic structure at multiple hierarchical levels  
903 in species with high historical abundance and high intra-specific morphological variation.  
904 Our results show a complex pattern of genetic structure in the two different data sets for  
905 each species. Although complex, we believe the structure observed in our results is  
906 biologically meaningful. Given the aforementioned difficulties with detecting structure  
907 using genetic techniques in this system – and the supporting morphometric results - even  
908 subtle signatures of structure are significant findings. The mitogenome data show support  
909 for the endemic ETP spinner and spotted dolphin subspecies. The nuclear SNP data show  
910 strong support for spotted dolphin subspecies but failed to find segregation in  
911 morphologically divergent spinner dolphin subspecies, although small sample size for the  
912 coastal subspecies limited power to detect genetic divergence.

913

914 A lack of differentiation in the SNP data between the two most geographically distant  
915 groups (the whitebelly and the Central American spinner dolphins) was unexpected,  
916 especially since strong differences were detected between the more proximate eastern and  
917 whitebelly forms.

918

919 We found very little support for the division of offshore stocks of spotted dolphins and no  
920 support for the unique form of Tres Marias spinner dolphins as compared to the eastern  
921 or Central American subspecies. This is not to say that these biological entities do not

922 exist, just that our data do not support them or may not have sufficient power to detect the  
923 subtle genetic differences between them. Efforts are being made to collect more SNP data  
924 (>1,000) from specimens collected throughout the range of these animals to perform  
925 high-resolution population structure analyses (Leslie and Morin, *In Review*). Further, we  
926 suggest the collection and analysis of additional samples from the Central American  
927 subspecies to compare to existing offshore subspecies samples collected from fisheries  
928 bycatch and research cruises. In addition, we highly recommend additional studies of  
929 nuDNA and studies of population structure that incorporate environmental variables as  
930 potential population boundaries in this area. Finally, placing these populations within a  
931 global phylogeographic context will help provide a better context for our results by fully  
932 characterizing intraspecific diversity and establishing the evolutionary process that led to  
933 ETP endemism.

934 **Acknowledgements:**

935

936 MSL was supported by a National Science Foundation (NSF) Graduate Research  
937 Fellowship, a NSF Integrative Graduate Education and Research Traineeship Fellowship,  
938 the Ralph A. Lewin Graduate Fellowship in Marine Biology at Scripps Institution of  
939 Oceanography, the Lerner-Grey Memorial Foundation at the American Museum of  
940 Natural History, and the Edna Bailey Sussman Foundation. We would especially like to  
941 thank Dr. William F. Perrin who provided guidance and support throughout the  
942 development and completion of this manuscript. Danielle Davila, Brittany Hancock-  
943 Hanser, Gabriela Serra-Valente, Victoria Pease, Kelly Robertson, Dr. Louella Dolar,  
944 Nicole Beaulieu and Morgane Lauf for help in the laboratory and tissue archive. Dr.  
945 Karen Martien provided a thoughtful critique of this manuscript. Al Jackson provided  
946 copies of original field datasheets. We thank Dr. Robin Baird of Cascadia Research  
947 Collective and Dr. Erin Oleson of the NOAA Pacific Islands Science Center for  
948 permission to use Hawai'ian spinner dolphin samples. The Scripps Research Institute  
949 provided assistance with sequencing and troubleshoots, especially Drs. Steve Head, Lana  
950 Shaffer and John Shimashita. Support for this research was also provided from Drs. Lisa  
951 Ballance and Barbara Taylor of the Marine Mammal and Turtle Division of SWFSC. We  
952 are grateful to William Perrin, Karen Martien, Kim Andrews, Patricia Rosel and three  
953 anonymous reviewers for their careful and constructive reviews of the manuscript.

954 **Literature Cited:**

955

956 Aitken, N., S. Smith, C. Schwarz, and P. A. Morin. 2004. Single nucleotide  
957 polymorphism (SNP) discovery in mammals: a targeted-gene approach. *Molecular*  
958 *Ecology* 13:1423-1431.

959

960 Andrews, K. R., W. F. Perrin, M. Oremus, *et al.* 2013. The evolving male: spinner  
961 dolphin (*Stenella longirostris*) ecotypes are divergent at Y chromosome but not mtDNA  
962 or autosomal markers. *Molecular Ecology* 22:408-2423.

963

964 Antao, T., A. Lopes, R. J. Lopes, A. Beja-Pereira, and G. Luikart. 2008. LOSITAN: A  
965 workbench to detect molecular adaptation based on a  $F_{ST}$ -outlier method. *BMC*  
966 *Bioinformatics*, 9(1):323.

967

968 Archer, F. I., P. E. Adams, B. B. Schneiders. 2016. STRATAG: An R package for  
969 manipulating, summarizing and analysing population genetic data. *Molecular Ecology*  
970 *Resource*. doi:10.1111/1755-0998.12559.

971

972 Archer, F. I., P. A. Morin, B. L. Hancock-Hanser, K. M. Robertson, M. S. Leslie, M.  
973 Berube, S. Panigada, B. L. Taylor. 2013. Mitogenomic phylogenetics of fin whales  
974 (*Balaenoptera physalus spp.*): genetic evidence for revision of subspecies. *PLoS ONE*  
975 8(5): e63396.

976

977 Avise, J. C. 1995. Mitochondrial DNA polymorphism and a connection between genetics  
978 and demography of relevance to conservation." *Conservation Biology* 9(3): 686-690.

979

980 Beaumont M. A., and R. A. Nichols. 1996. Evaluating loci for use in the genetic analysis  
981 of population structure. *Proceedings of the Royal Society of Londong B* 263:1619-1626.  
982

983 Dizon, A.E., W. F. Perrin, and P. A. Akin. 1994. Stocks of dolphins (*Stenella* spp. and  
984 *Delphinus delphis*) in the eastern tropical Pacific: a phylogeographic classification.  
985 NOAA Technical Report NMFS 119, 20pp.  
986

987 Dornburg, A., M. C. Brandley, M. R. McGowen, and T. J. Near. 2012. Relaxed clocks  
988 and inferences of heterogeneous patterns of nucleotide substitution and divergence time  
989 estimates across whales and dolphins (Mammalia: Cetacea). *Molecular Biology and*  
990 *Evolution* 29:721-736.  
991

992 Douglas, M.E., G. D. Schnell, D. J. Hough, and W. F. Perrin. 1992. Geographic variation  
993 in cranial morphology of spinner dolphins *Stenella longirostris* in the eastern tropical  
994 Pacific Ocean. *Fisheries Bulletin* 90:54-76.  
995

996 Drummond, A., and A. Rambaut. 2007. BEAST: Bayesian evolutionary analysis by  
997 sampling trees. *BMC Evolutionary Biology* 7:214.  
998

999 Duchene, S., F. I. Archer, J. Vilstrup, S. Caballero, and P. A. Morin. 2011. Mitogenome  
1000 phylogenetics: The impact of using single regions and partitioning schemes  
1001 on topology, substitution rate and divergence time estimation. *PLoS ONE* 6(11): e27138.  
1002 doi:10.1371/journal.pone.0027138.  
1003



- 1004 Eriksson, J., G. Larson, U. Gunnarsson, B. Bed'hom, M. Tixier-Boichard, *et al.* 2008.  
1005 Identification of the yellow skin gene reveals a hybrid origin of the domestic chicken.  
1006 PLoS Genetics 4(2): e1000010 10.1371/journal.pgen.10000010.  
1007  
1008 Escorza-Treviño, S., F. I. Archer, M. Rosales, A. Dizon, and A. Lang. 2005. Genetic  
1009 differentiation and intraspecific structure of Eastern Tropical Pacific spotted dolphins,  
1010 *Stenella attenuata*, revealed by DNA analyses. Conservation Genetics 6(4): 587-600.  
1011  
1012 Evanno, G., S. Regnaut, and J. Goudet. 2005. Detecting the number of clusters of  
1013 individuals using the software STRUCTURE: a simulation study. Molecular Ecology 14:  
1014 2611-2620.  
1015  
1016 Excoffier, L. and H. E. L. Lischer. 2010. Arlequin suite ver 3.5: A new series of  
1017 programs to perform population genetics analyses under Linux and Windows. Molecular  
1018 Ecology Resources 10:564-567.  
1019  
1020 Excoffier, L., P. E. Smouse, and J. M. Quattro. 1992. Analysis of molecular variance  
1021 inferred from metric distances among DNA haplotypes: application to human  
1022 mitochondrial DNA restriction data. Genetics 131(2):479.  
1023  
1024 Foll, M. and O. E. Gaggiotti. 2008. A genome scan method to identify selected loci  
1025 appropriate for both dominant and codominant markers: A Bayesian perspective.  
1026 Genetics 180:977-993.  
1027  
1028 Galver, L. 2002. The molecular ecology of spinner dolphins, *Stenella longirostris*:  
1029 genetic diversity and population structure. Ph.D. Dissertation, University of California.

1030

1031 Gerrodette, T., G. Watters, W. Perryman, and L. T. Balance. 2008. Estimates of 2006  
1032 dolphin abundance in the eastern tropical Pacific, with revised estimates from 1986-2003.  
1033 NOAA Tech. Memo. NMFS-SWFSC-422.

1034

1035 Gosliner, M. L. 1999. The tuna-dolphin controversy. Pages 120-155 in J. R. Twiss Jr. and  
1036 R. R. Reeves, eds. Conservation and management of marine mammals. Smithsonian  
1037 Institution Press, Washington DC.

1038

1039 Hancock-Hanser, B., A. Frey, M. S. Leslie, P. H. Dutton, and P. A. Morin. 2013.  
1040 Targeted multiplex next-generation sequencing: Advances in techniques of mitochondrial  
1041 and nuclear sequencing for population genomics. *Molecular Ecology Resources* 13:254-  
1042 268.

1043

1044 Hoekstra, H. E., R. J. Hirschmann, R. A. Bunday, P. A. Insel, and J. P. Crossland. 2006.  
1045 A single amino acid mutation contributes to adaptive beach mouse color pattern. *Science*,  
1046 313(5783):101-104.

1047

1048 Hoelzel, A. R., J. Hey, M. E. Dahlheim, C. Nicholson, V. Burkanov, and N. Black. 2007.  
1049 Evolution of population structure in a highly social top predator, the killer whale.  
1050 *Molecular Biology and Evolution* 24 (6):1407-1415.

1051

1052 Horne, J. B. 2014. Thinking outside the barrier: neutral and adaptive divergence in Indo-  
1053 Pacific coral reef faunas. *Ecology and Evolution* 28(6):991-1002.

1054

- 1055 Hubbard, J. K., J. A. C. Uy, M. E. Hauber, H. E. Hoekstra, and R. J. Safran. 2010.  
1056 Vertebrate pigmentation: from underlying genes to adaptive function. *Trends in Genetics*,  
1057 26(5):231-239.  
1058
- 1059 Hubisz, M., D. Falush, M. Stephens, and J. Pritchard. 2009. Inferring weak population  
1060 structure with the assistance of sample group information. *Molecular Ecology Resources*  
1061 9:1322-1332.  
1062
- 1063 Joseph, J. 1994. The tuna-dolphin controversy in the eastern Pacific Ocean: Biological,  
1064 economic and political impacts. *Ocean Development and International Law* 25:1-30.  
1065
- 1066 Jukes, T. H., and C. R. Cantor. 1969. Evolution of protein molecules. Pages 21-132 in H.  
1067 M. Munro, ed. *Mammalian protein metabolism*. Academic Press, New York.  
1068
- 1069 Kalinowsky, S. T. 2010. The computer program STRUCTURE does not reliably identify  
1070 the main genetic clusters within species: simulations and implications for human  
1071 population structure. *Heredity* 106(4):625-632.  
1072
- 1073 Katoh, K., G. Asimenos, and H. Toh. 2009. Multiple alignment of DNA sequences with  
1074 MAFFT. *Methods in Molecular Biology* 537:39–64.  
1075
- 1076 Lambertsen, R. H. 1987. A biopsy system for large whales and its use for cytogenetics.  
1077 *Journal of Mammalogy* 68:443-445.  
1078
- 1079 Leslie, M. S., and P. A. Morin. In Review. Using genome-wide SNPs to detect structure  
1080 in high-diversity and low-divergence populations of severely impacted eastern tropical

- 1081 Pacific spinner (*Stenella longirostris*) And pantropical spotted dolphins (*S. attenuata*).  
1082 Frontiers in Marine Science.  
1083  
1084  
1085 Li, H., and R. Durbin. 2009. Fast and accurate short read alignment with Burrows -  
1086 Wheeler transform. *Bioinformatics* 25:1754-1760.  
1087  
1088 Li, H., B. Handsaker, A. Wysoker, *et al.* 2009. The sequence alignment/map format and  
1089 SAMtools. *Bioinformatics* 25:2078-2079.  
1090  
1091 Lo, N., and T. D. Smith. 1986. Incidental mortality of dolphins in the eastern tropical  
1092 Pacific, 1959-72. *Fishery Bulletin* 84: 27-34.  
1093  
1094 Lyons, L., T. Laughlin, N. Copeland, *et al.* 1997. Comparative anchor tagged sequences  
1095 (CATS) for integrative mapping of mammalian genomes. *Nature Genetics* 15:47-56.  
1096  
1097 McKenna, A., M. Hanna, E. Banks, *et al.* 2009. The Genome Analysis Toolkit: a  
1098 MapReduce framework for analyzing next-generation DNA sequencing data. *Genome*  
1099 *Research* 20(9):1297-1303.  
1100  
1101 Meirmans, P. G. and P. W. Hedrick 2011. Assessing population structure: FST and  
1102 related measures. *Molecular Ecology Resources* 11(1):5-18.  
1103  
1104 Morin, P. A., F. I. Archer, A. D. Foote, *et al.* 2010. Complete mitochondrial genome  
1105 phylogeographic analysis of killer whales (*Orcinus orca*) indicates multiple species.  
1106 *Genome Research* 20: 908-916.

1107

1108 Morin, P. A., F. I. Archer, V. L. Pease, *et al.* 2012. Emperical comparison of single  
1109 nucleotide polymorphisms and microsatellites for population and demographic analyses  
1110 of bowhead whales. *Endangered Species Research* 19:129-147.

1111

1112 Moritz, C. 1994. Applications of mitochondrial DNA analysis in conservation: a critical  
1113 review. *Molecular Ecology* 3:401-411.

1114

1115 Narum, S. R., and J. E. HESS. 2011. Comparison of  $F_{ST}$  outlier tests for SNP loci under  
1116 selection. *Molecular Ecology Resources* 11:184–194.

1117

1118 National Research Council. 1992. Dolphins and the tuna industry. National Academy  
1119 Press, Washington DC.

1120

1121 Nei, M. 1987. *Molecular evolutionary genetics*. Columbia University Press.

1122

1123 Nei, M., and Gojobori T. 1986. Simple method for estimating the number of synonymous  
1124 and nonsynonymous nucleotide substitutions. *Molecular Biology and Evolution* 3:418-  
1125 426.

1126

1127 Norris, Richard D. 2000. Pelagic species diversity, biogeography, and evolution.  
1128 *Paleobiology* 26.sp4: 236-258.

1129

1130 Perrin, W. F., P.A. Akin, and J. V. Kashiwada. 1991. Geographic variation in external  
1131 morphology of the spinner dolphin *Stenella longirostis* in the eastern Pacific and  
1132 implications for conservation. *Fisheries Bulletin* 89(3):411-428.

1133

1134 Perrin, W. F., M. L. L. Dolar, and D. Robineau. 1999. Spinner dolphins (*Stenella*  
1135 *longirostris*) of the western Pacific and Southeast Asia: pelagic and shallow-water forms.  
1136 *Marine Mammal Science* 15(4): 1029-1053.

1137

1138 Perrin, W. F., W. E. Evans and D. B. Holts. 1979. Movements of pelagic dolphins  
1139 (*Stenella* spp.) in the eastern tropical Pacific as indicated by results of tagging, with  
1140 summary of tagging operations, 1969-76. NOAA Technical Memo NMFS 737:14 pp.

1141

1142 Perrin, W. F., and J. R. Henderson, 1979. Growth & reproductive rates in two populations  
1143 of spinner dolphins, *Stenella longirostris*, with different histories of exploitation. Reports  
1144 of the International Whaling Commission Special Issue 6:417–430.

1145

1146 Perrin W. F., and S. L. Mesnick. 2003. Sexual ecology of the spinner dolphin, *Stenella*  
1147 *longirostris*: Geographic variation in mating system. *Marine Mammal Science* 19:462-  
1148 483.

1149

1150 Perrin, W. F., N. Miyazaki, and T. Kasuya. 1989. A dwarf form of the spinner dolphin  
1151 (*Stenella longirostris*) from Thailand. *Marine Mammal Science* 5:213-227.

1152

1153 Perrin, W. F., G. D. Schnell, D. J. Hough, J. W. Gilpatrick Jr., and J. V. Kashiwada. 1994.  
1154 Reexamination of geographic variation in cranial morphology of the pantropical spotted  
1155 dolphin, *Stenella attenuata*, in the eastern Pacific. *Fisheries Bulletin* 92(2):324-346.

1156

1157 Perrin, W. F., M. D. Scott, G. J. Walker, and V. L. Cass. 1985. Review of geographical  
1158 stocks of tropical dolphins (*Stenella* spp. and *Delphinus delphis*) in the eastern Pacific.  
1159 NOAA Technical Report NMFS 28. 28 pp.  
1160  
1161 Perrin, W. F., E. D. Mitchell, J. G. Mead, D. K. Caldwell, M. C. Caldwell, P. J. H. Van  
1162 Bree, and W. H. Dawbin. 1987. Revision of the spotted dolphins, *Stenella* spp. Marine  
1163 Mammal Science 3:99–170.  
1164  
1165 Perryman, W. L., and R. L. Westlake. 1998. A new geographic form of the spinner  
1166 dolphin, *Stenella longirostris*, detected with aerial photogrammetry. Marine Mammal  
1167 Science 14:38-50.  
1168  
1169 Posada, D. 2008. jModelTest: Phylogenetic model averaging. Molecular Biology and  
1170 Evolution 25:1253-1256.  
1171  
1172 Pritchard, J. K., M. Stephens, and P. Donnelly. 2000. Inference of population structure  
1173 using multilocus genotype data. Genetics 155.2:945-959.  
1174  
1175 R Core Team. 2014. R: A language and environment for statistical computing. R  
1176 Foundation for Statistical Computing, Vienna, Austria. <http://www.R-project.org/>.  
1177  
1178 Rieder, S., S. Taourit, D. Mariat, B. Langlois, and G. Guérin. 2001. Mutations in the  
1179 agouti (ASIP), the extension (MC1R), and the brown (TYRP1) loci and their association  
1180 to coat color phenotypes in horses (*Equus caballus*). Mammalian Genome, 12(6):450–  
1181 455.  
1182

- 1183 Russello, M. A., S. L. Kirk, K. K. Frazer, and P. J. Askey. 2012. Detection of outlier loci  
1184 and their utility for fisheries management. *Evolutionary Applications* 5:39–52.  
1185
- 1186 Scott, M. D., S. J. Chivers, R. J. Olson, P. C. Fiedler, and K. Holland. 2012. Pelagic  
1187 predator associations: Tuna and dolphins in the eastern tropical Pacific Ocean. *Marine*  
1188 *Ecology Progress Series* 458:283-302.  
1189
- 1190 Stamatakis, A., T. Ludwig, and H. Meier. 2005. RAxML-III: a fast program for  
1191 maximum likelihood-based inference of large phylogenetic trees. *Bioinformatics* 21:456-  
1192 463.  
1193
- 1194 Stewart, J. B., C. Freyer, J. L. Elson, A. Wredenber, Z. Cansu, A. Trifunovic, N.  
1195 Larrson. 2008. Strong purifying selection in transmission of mammalian mitochondrial  
1196 DNA. *PLoS Biol* 6(1): e10. doi: 10.1371/journal.pbio.0060010  
1197
- 1198 Tajima, F. 1983. Evolutionary relationship of DNA sequences in finite populations.  
1199 *Genetics* 105(2):437-460.  
1200
- 1201 Tamura, K. and M. Nei. 1993. Estimation of the number of nucleotide substitutions in the  
1202 control region of mitochondrial DNA in humans and chimpanzees. *Molecular Biology*  
1203 *and Evolution* 10:512–26.  
1204
- 1205 Tamura, K., D. Peterson, N. Peterson, *et al.* 2011. MEGA5: Molecular Evolutionary  
1206 genetics analysis using maximum likelihood, evolutionary distance, and maximum  
1207 parsimony methods. *Molecular Biology and Evolution* 28:2731-2739.  
1208



- 1209 Tavaré, S. 1986. Some probabilistic and statistical problems on the analysis of DNA  
1210 sequences. *Lectures on Mathematics in the Life Sciences* 17:57-86.  
1211
- 1212 Taylor, B. L., and Dizon A. E. 1996. The need to estimate power to link genetics and  
1213 demography for conservation. *Conservation Biology* 10:661–664.  
1214
- 1215 Taylor, B. L., Chivers, S. J., Sexton, S., and Dizon, A. E. 2000. Evaluating dispersal  
1216 estimates using mtDNA data: Comparing analytical and simulation approaches.  
1217 *Conservation Biology* 14:1287–1297.  
1218
- 1219 Wade, P. R. 1995. Revised estimates of incidental kill of dolphins (Delphinidae) by the  
1220 purse-seine tuna fishery in the eastern tropical Pacific, 1959-1972. *Fishery Bulletin*  
1221 93:345-354.  
1222
- 1223 Wade, P. R., G. M. Watters, T. Gerrodette, and S. B. Reilly. 2007. Depletion of spotted  
1224 and spinner dolphins in the eastern tropical Pacific: Modelling hypotheses for their lack  
1225 of recovery. *Marine Ecology Progress Series* 343:1-14.  
1226
- 1227 Waples, R. S. 1998. Separating the wheat from the chaff: patterns of genetic  
1228 differentiation in high gene flow species. *Journal of Heredity* 89(5):438-450.  
1229
- 1230 Willing, E.-M., C. Dreyer, and C. van Oosterhout. 2012. Estimates of genetic  
1231 differentiation measured by  $F_{ST}$  do not necessarily require large sample sizes when using  
1232 many SNP markers. *PLoS ONE* 7(8): e42649.  
1233

- 1234 Weir, B.S., and C. C. Cockerham. 1984. Estimating F-statistics for the analysis of  
1235 population structure. *Evolution* 38(6):1358-1370.  
1236
- 1237 Wright, S. 1949. The genetical structuring of populations. *Annals of Eugenics* 15(1):323-  
1238 354.  
1239
- 1240 Xiong, Y., M. C. Brandley, S. Xu, K. Zhou, and G. Yang. 2009. Seven new dolphin  
1241 mitochondrial genomes and a time-calibrated phylogeny of whales. *BMC Evolutionary*  
1242 *Biology* 9:20.

1 *Table 1.* Summary statistics for ETP spinner (A) and spotted (B) dolphin mitogenome  
 2 data. n<sub>H</sub>: number of haplotypes; PS: polymorphic sites; h: haplotype diversity;  $\pi$ :  
 3 nucleotide diversity; %: percent of unique haplotypes.  
 4

| <b>A. Spinner dolphins <i>Stenella longirostris</i> (n = 104)</b> |                          |                      |           |          |                         |          |
|-------------------------------------------------------------------|--------------------------|----------------------|-----------|----------|-------------------------|----------|
| <b>Subspecies/Stock</b>                                           | <b>n:female/male/unk</b> | <b>n<sub>H</sub></b> | <b>PS</b> | <b>h</b> | <b><math>\pi</math></b> | <b>%</b> |
| Central American<br><i>S. l. centroamericana</i>                  | 9:4/4/1                  | 8                    | 648       | 0.9722   | 0.0057                  | 0.7778   |
| eastern~<br><i>S. l. orientalis</i>                               | 53:28/19/6               | 51                   | 648       | 0.9985   | 0.0073                  | 0.9245   |
| <b>Putative Stocks</b>                                            |                          |                      |           |          |                         |          |
| whitebelly<br><i>S. l. longirostris</i>                           | 27:16/11/0               | 27                   | 457       | 1        | 0.0043                  | 1        |
| Tres Marias^~<br><i>S. l. orientalis</i>                          | 21:8/10/3                | 20                   | 373       | 0.9952   | 0.0078                  | 0.9048   |
| Hawai'i<br><i>S. l. longirostris</i>                              | 15:1/4/10                | 9                    | 104       | 0.9921   | 0.0068                  | 0.8260   |

| <b>B. Spotted dolphins <i>Stenella attenuata</i> (n = 76)</b>           |                          |                      |           |          |                         |          |
|-------------------------------------------------------------------------|--------------------------|----------------------|-----------|----------|-------------------------|----------|
| <b>Subspecies</b>                                                       | <b>n:female/male/unk</b> | <b>n<sub>H</sub></b> | <b>PS</b> | <b>h</b> | <b><math>\pi</math></b> | <b>%</b> |
| Coastal<br><i>S. a. graffmani</i>                                       | 24:11/13/0               | 16                   | 234       | 0.9529   | 0.0162                  | 0.5000   |
| ETP offshore <sup>§</sup><br><i>S. a. attenuata</i>                     | 47:20/19/8               | 43                   | 519       | 0.9804   | 0.0198                  | 0.7222   |
| <b>Offshore Stocks (<i>S. a. attenuata</i>) - Current and Putative^</b> |                          |                      |           |          |                         |          |
| northeastern                                                            | 25:10/8/7                | 22                   | 400       | 0.9867   | 0.0238                  | 0.8000   |
| western-southern                                                        | 17:9/7/1                 | 17                   | 298       | 1        | 0.0096                  | 1        |
| Offshore western^                                                       | 8:7/1/0                  | 8                    | 191       | 1        | 0.0087                  | 1        |
| Offshore southern^                                                      | 9:2/6/1                  | 9                    | 253       | 1        | 0.0092                  | 1        |
| Hawai'i                                                                 | 5:1/3/1                  | 3                    | 36        | 0.7000   | 0.0244                  | 0.4000   |

6 ^ Stocks that are not recognized for management purposes. ~ The Tres Marias  
 7 spinner samples are part of the eastern stratum. § Includes data for five samples that  
 8 were omitted from stock comparisons because they were sampled too close to  
 9 geographic stock boundaries.

0 **Table 2:** Pairwise divergence estimates for subspecies and stocks of spinner dolphins based on concatenated mitogenome data ( $F_{ST}$ ,  $\Phi_{ST}$  and  $\chi^2$ ) and  
 1 partitioned mitogenomic data ( $\Phi_{ST}$  only). Light gray backgrounds for  $p < 0.05$ ; medium gray for  $p < 0.01$ ; darker gray backgrounds for  $p < 0.001$  ( $p$ -  
 2 values in parentheses).  
 3

| Taxon 1 (n)<br>vs.<br>Taxon 2 (n)         | Concatenated mitogenome |                          | Partitioned mitogenome $\Phi_{ST}$ (p-value) |                     |                     |                     |                     |                     |                     |                     |                     |                     |                     |                     |                     |                     |                     |
|-------------------------------------------|-------------------------|--------------------------|----------------------------------------------|---------------------|---------------------|---------------------|---------------------|---------------------|---------------------|---------------------|---------------------|---------------------|---------------------|---------------------|---------------------|---------------------|---------------------|
|                                           | $F_{ST}$<br>(p-value)   | $\Phi_{ST}$<br>(p-value) | 12s<br>$n_H=24$                              | 16s<br>$n_H=24$     | ATP6<br>$n_H=53$    | ATP8<br>$n_H=11$    | COI<br>$n_H=65$     | COII<br>$n_H=39$    | COIII<br>$n_H=47$   | CYTB<br>$n_H=61$    | CR<br>$n_H=50$      | ND1<br>$n_H=59$     | ND2<br>$n_H=53$     | ND3<br>$n_H=21$     | ND4<br>$n_H=56$     | ND4L<br>$n_H=22$    | ND5<br>$n_H=70$     |
| Central Amer. (9)<br>vs. eastern (53)     | 0.0133<br>(0.034)       | -0.0127<br>(0.5235)      | -0.0120<br>(0.5265)                          | 0.0061<br>(0.4977)  | -0.0076<br>(0.4001) | 0.0590<br>(0.0801)  | -0.0276<br>(0.8640) | -0.0199<br>(0.6988) | -0.0158<br>(0.5766) | -0.0094<br>(0.4711) | 0.0017<br>(0.3983)  | 0.0148<br>(0.2501)  | -0.0260<br>(0.7376) | 0.0338<br>(0.1325)  | -0.0287<br>(0.6950) | -0.0268<br>(0.7444) | -0.0139<br>(0.5368) |
| Central Amer. (9)<br>vs. whitebelly (27)  | 0.0128<br>(0.056)       | 0.0490<br>(0.0542)       | -0.0165<br>(0.5882)                          | 0.0217<br>(0.1947)  | 0.0311<br>(0.1277)  | 0.1279<br>(0.0189)  | 0.0351<br>(0.0903)  | 0.0936<br>(0.0144)  | 0.0086<br>(0.2995)  | 0.0601<br>(0.0456)  | 0.0555<br>(0.0412)  | 0.0844<br>(0.0362)  | 0.0113<br>(0.2833)  | 0.1505<br>(0.0054)  | 0.0870<br>(0.0464)  | 0.0478<br>(0.0931)  | 0.0273<br>(0.1203)  |
| eastern (53) vs.<br>whitebelly (27)       | 0.0007<br>(0.2867)      | 0.0181<br>(0.0741)       | 0.0307<br>(0.0414)                           | 0.0159<br>(0.0835)  | 0.0051<br>(0.2421)  | -0.0065<br>(0.5546) | 0.0264<br>(0.0288)  | 0.0342<br>(0.0152)  | -0.0020<br>(0.4501) | 0.0154<br>(0.1165)  | 0.0270<br>(0.0059)  | 0.0260<br>(0.0468)  | 0.0104<br>(0.1687)  | 0.0638<br>(0.0018)  | 0.0464<br>(0.0422)  | 0.0343<br>(0.0214)  | 0.0026<br>(0.2859)  |
| Tres Marias (21) vs.<br>Central Amer. (9) | 0.0155<br>(0.0914)      | -0.0345<br>(0.7576)      | 0.0113<br>(0.2921)                           | -0.0283<br>(0.7240) | -0.0436<br>(0.7284) | -0.0082<br>(0.2863) | -0.0393<br>(0.8636) | -0.0318<br>(0.7150) | -0.0301<br>(0.6752) | -0.0238<br>(0.5872) | -0.0102<br>(0.5328) | -0.0158<br>(0.5219) | -0.0451<br>(0.8698) | 0.0022<br>(0.4025)  | -0.0558<br>(0.8900) | -0.0638<br>(0.9470) | -0.0383<br>(0.7888) |
| Tres Marias (21) vs.<br>eastern (32)      | 0.0009<br>(0.4107)      | -0.0116<br>(0.7084)      | -0.0109<br>(0.6474)                          | -0.0217<br>(0.9462) | -0.0088<br>(0.5169) | 0.0019<br>(0.3119)  | -0.0124<br>(0.7654) | -0.0182<br>(0.8772) | -0.0150<br>(0.8116) | -0.0062<br>(0.5291) | -0.0135<br>(0.8454) | -0.0117<br>(0.6898) | -0.0031<br>(0.4447) | -0.0206<br>(0.8894) | -0.0185<br>(0.7898) | -0.0049<br>(0.4887) | -0.0105<br>(0.6442) |
| Tres Marias (21) vs.<br>whitebelly (27)   | 0.0024<br>(0.1934)      | 0.0263<br>(0.0807)       | 0.0421<br>(0.0643)                           | 0.0111<br>(0.1979)  | 0.0086<br>(0.2423)  | 0.0175<br>(0.2421)  | 0.0323<br>(0.0519)  | 0.0406<br>(0.0362)  | -0.0005<br>(0.3907) | 0.0311<br>(0.0765)  | 0.0413<br>(0.0168)  | 0.0359<br>(0.0636)  | 0.0243<br>(0.1087)  | 0.0676<br>(0.0052)  | 0.0859<br>(0.0789)  | 0.0485<br>(0.0448)  | 0.0124<br>(0.1807)  |
| Hawaii (15) vs.<br>whitebelly (27)        | 0.0456<br>(0.0001)      | 0.1964<br>(0.0002)       | 0.0236<br>(0.1667)                           | 0.3590<br>(0.0002)  | 0.2560<br>(0.0002)  | -0.0127<br>(0.6582) | 0.1964<br>(0.0002)  | 0.1885<br>(0.0006)  | 0.0154<br>(0.1363)  | 0.1031<br>(0.0004)  | 0.0771<br>(0.0036)  | 0.0818<br>(0.0026)  | 0.3302<br>(0.0002)  | 0.4467<br>(0.0002)  | 0.1324<br>(0.0002)  | -0.0137<br>(0.2197) | 0.1858<br>(0.0002)  |
| Hawaii (15) vs.<br>eastern (53)           | 0.0449<br>(0.0001)      | 0.1849<br>(0.0002)       | 0.0428<br>(0.0605)                           | 0.3293<br>(0.0002)  | 0.2268<br>(0.0002)  | -0.0002<br>(0.4031) | 0.2061<br>(0.0002)  | 0.2104<br>(0.0002)  | 0.0338<br>(0.0625)  | 0.1182<br>(0.0026)  | 0.2050<br>(0.0002)  | 0.1406<br>(0.0012)  | 0.3090<br>(0.0002)  | 0.3283<br>(0.0002)  | 0.1339<br>(0.0025)  | 0.0170<br>(0.1643)  | 0.1494<br>(0.0007)  |
| Hawaii (15) vs.<br>Central Amer. (9)      | 0.0636<br>(0.0219)      | 0.3284<br>(0.0002)       | -0.0083<br>(0.4045)                          | 0.5265<br>(0.0002)  | 0.3328<br>(0.0004)  | 0.1600<br>(0.0631)  | 0.3983<br>(0.0002)  | 0.4280<br>(0.0002)  | 0.1415<br>(0.0034)  | 0.2474<br>(0.0002)  | 0.2464<br>(0.0002)  | 0.3091<br>(0.0002)  | 0.4352<br>(0.0004)  | 0.3863<br>(0.0002)  | 0.2728<br>(0.0002)  | 0.1597<br>(0.0701)  | 0.2854<br>(0.0004)  |
| Hawaii (15) vs.<br>Tres Marias (21)       | 0.0487<br>(0.0004)      | 0.2260<br>(0.0002)       | 0.0796<br>(0.0478)                           | 0.3900<br>(0.0002)  | 0.2552<br>(0.0002)  | 0.0339<br>(0.2507)  | 0.2576<br>(0.0002)  | 0.2351<br>(0.0002)  | 0.0703<br>(0.0272)  | 0.1398<br>(0.0004)  | 0.1533<br>(0.0002)  | 0.1958<br>(0.0002)  | 0.3454<br>(0.0002)  | 0.3608<br>(0.0002)  | 0.1667<br>(0.0004)  | 0.0630<br>(0.0669)  | 0.1828<br>(0.0002)  |

14 *Table 3.* Pairwise divergence estimates ( $F_{ST}$ ) for spinner and spotted dolphin subspecies, respectively,  
 15 using all nuclear SNPs, and using only neutral SNPs. Light gray backgrounds for  $p < 0.05$ ; Medium  
 16 gray for  $p < 0.01$ ; darker gray backgrounds for  $p < 0.001$ .  
 17

| <b>Spinner dolphins</b>             |                                     | <b>All 51 SNPs</b>           | <b>42 Neutral SNPs</b>       |
|-------------------------------------|-------------------------------------|------------------------------|------------------------------|
| <b>Taxon 1</b><br>n:female/male/unk | <b>Taxon 2</b><br>n:female/male/unk | $F_{ST}$<br><b>(p-value)</b> | $F_{ST}$<br><b>(p-value)</b> |
| Central American<br>7:3/3/1         | eastern<br>28:15/7/6                | -0.0023<br>(0.4485)          | -0.0066<br>(0.5148)          |
| Central American<br>7:3/3/1         | whitebelly<br>21:12/9/0             | 0.0148<br>(0.2607)           | 0.0082<br>(0.3216)           |
| eastern<br>28:15/7/6                | whitebelly<br>21:12/9/0             | 0.0297<br>(0.0059)           | 0.0282<br>(0.0099)           |
| <b>Spotted dolphins</b>             |                                     | <b>All 36 SNPs</b>           | <b>25 Neutral SNPs</b>       |
| Offshore<br>13:6/6/1                | Coastal<br>12:5/7/0                 | 0.1711<br>(0.001)            | 0.1493<br>(0.0005)           |

0 **Table 4:** Pairwise divergence estimates for subspecies and stocks of spotted dolphins using concatenated mitogenome data ( $F_{ST}$ ,  $\Phi_{ST}$  and  $\chi^2$ ) and  
 1 partitioned mitogenomic data ( $\Phi_{ST}$  only).  $n_H$  listed below each gene name is the number of haplotypes for that gene. Light gray backgrounds for  
 2  $p < 0.05$ ; medium gray for  $p < 0.01$ ; darker gray backgrounds for  $p < 0.001$  (p-values in parentheses). “NA” indicates comparisons where  $\Phi_{ST}$  could not  
 3 be estimated because all individuals in both strata share the same haplotype. “\*” are where one stratum was  $n < 5$ .

| Taxon 1 (n) vs.<br>Taxon 2 (n)                    | Concatenated mitogenome |                          | Partitioned mitogenome $\Phi_{ST}$ (p-value) |                     |                     |                     |                     |                     |                     |                     |                      |                     |                     |                     |                     |                     |                     |
|---------------------------------------------------|-------------------------|--------------------------|----------------------------------------------|---------------------|---------------------|---------------------|---------------------|---------------------|---------------------|---------------------|----------------------|---------------------|---------------------|---------------------|---------------------|---------------------|---------------------|
|                                                   | $F_{ST}$<br>(p-value)   | $\Phi_{ST}$<br>(p-value) | 12S<br>$n_H=6$                               | 16S<br>$n_H=7$      | ATP6<br>$n_H=20$    | ATP8<br>$n_H=5$     | COI<br>$n_H=21$     | COII<br>$n_H=13$    | COIII<br>$n_H=11$   | CYTB<br>$n_H=20$    | CR<br>$n_H=20$       | ND1<br>$n_H=15$     | ND2<br>$n_H=17$     | ND3<br>$n_H=10$     | ND4<br>$n_H=23$     | ND4L<br>$n_H=2$     | ND5<br>$n_H=29$     |
| Coastal (24) vs.<br>Offshore (52)                 | 0.0125<br>(0.0402)      | -0.0091<br>(0.4961)      | 0.0089<br>(0.2553)                           | -0.0316<br>(0.9932) | -0.0149<br>(0.6788) | -0.0169<br>(0.7536) | 0.0018<br>(0.3265)  | -0.0133<br>(0.6182) | -0.0243<br>(0.8890) | -0.0143<br>(0.6067) | -0.0122<br>(0.7336)  | -0.0099<br>(0.5357) | -0.0198<br>(0.7610) | -0.0222<br>(0.9006) | -0.0042<br>(0.4085) | 0.0041<br>(0.3023)  | -0.0056<br>(0.4217) |
| Northeastern (25) vs.<br>western-southern (17)    | 0.0045<br>(0.2099)      | -0.0076<br>(0.4111)      | -0.0014<br>(0.3779)                          | 0.0079<br>(0.2841)  | -0.0156<br>(0.5332) | 0.0057<br>(0.2691)  | -0.0194<br>(0.6164) | 0.0003<br>(0.3637)  | -0.0193<br>(0.5067) | -0.0211<br>(0.5423) | -0.0091<br>(0.5552)  | 0.0086<br>(0.2585)  | -0.0021<br>(0.3473) | -0.0068<br>(0.4139) | 0.0039<br>(0.3077)  | -0.0038<br>(0.3771) | -0.0187<br>(0.5574) |
| Coastal (24) vs.<br>northeastern (25)             | 0.0302<br>(0.0002)      | -0.0082<br>(0.4405)      | 0.0032<br>(0.3375)                           | -0.0326<br>(0.8096) | -0.0204<br>(0.7070) | -0.0061<br>(0.4689) | -0.0007<br>(0.3651) | -0.0060<br>(0.4325) | -0.0271<br>(0.7540) | -0.0201<br>(0.6148) | -0.0041<br>(0.4653)  | 0.0031<br>(0.3041)  | -0.0119<br>(0.4797) | -0.0105<br>(0.4947) | 0.0055<br>(0.2923)  | 0.0016<br>(0.3249)  | -0.0125<br>(0.5309) |
| Coastal (24) vs.<br>western-southern (17)         | 0.0144<br>(0.0884)      | -0.0342<br>(0.8102)      | -0.0186<br>(0.5621)                          | -0.0356<br>(0.6598) | -0.0297<br>(0.7402) | 0.0081<br>(0.3153)  | -0.0313<br>(0.8118) | -0.0355<br>(0.8624) | -0.0449<br>(0.8950) | -0.0385<br>(0.8666) | -0.0024<br>(0.8060)  | -0.0392<br>(0.9142) | -0.0335<br>(0.7224) | -0.0393<br>(0.9112) | -0.0311<br>(0.7582) | -0.0360<br>(0.7624) | -0.0285<br>(0.6812) |
| Offshore southern (9)<br>vs. offshore western (8) | 0.0771<br>(0.2249)      | 0.1666<br>(0.0668)       | -0.1717<br>(0.0781)                          | 0.2129<br>(0.0618)  | 0.1167<br>(0.1039)  | 0.1117<br>(0.0801)  | 0.1229<br>(0.0743)  | 0.1361<br>(0.0939)  | 0.1816<br>(0.0767)  | -0.0471<br>(0.4611) | 0.0683<br>(0.1177)   | 0.1767<br>(0.0575)  | 0.1771<br>(0.0743)  | 0.1155<br>(0.1183)  | 0.2148<br>(0.0394)  | 0.1382<br>(0.1231)  | 0.1895<br>(0.0529)  |
| Northeastern (25) vs.<br>offshore western (8)     | 0.0027<br>(0.4291)      | 0.1135<br>(0.0517)       | 0.0853<br>(0.0945)                           | 0.1848<br>(0.0352)  | 0.0728<br>(0.1223)  | 0.1128<br>(0.0252)  | 0.0575<br>(0.1397)  | 0.1164<br>(0.0504)  | 0.1117<br>(0.0749)  | 0.0064<br>(0.3259)  | 0.0348<br>(0.1635)   | 0.1525<br>(0.0372)  | 0.1179<br>(0.0775)  | 0.1142<br>(0.0697)  | 0.1497<br>(0.0394)  | 0.1309<br>(0.0689)  | 0.0894<br>(0.0957)  |
| Northeastern (25) vs.<br>offshore southern (9)    | 0.0073<br>(0.3755)      | -0.0400<br>(0.7446)      | -0.0242<br>(0.5728)                          | -0.0537<br>(0.8008) | -0.0468<br>(0.8162) | -0.0691<br>(0.9552) | -0.0291<br>(0.6287) | -0.0387<br>(0.7512) | -0.0491<br>(0.7828) | -0.0509<br>(0.8168) | -0.0300<br>(0.7886)  | -0.0379<br>(0.7394) | -0.0392<br>(0.7150) | -0.0551<br>(0.9540) | -0.0238<br>(0.5626) | -0.0694<br>(0.9756) | -0.0327<br>(0.6092) |
| Coastal (24) vs.<br>offshore southern (9)         | 0.0255<br>(0.0762)      | -0.0130<br>(0.4065)      | -0.0323<br>(0.5874)                          | -0.0277<br>(0.4713) | -0.0279<br>(0.5721) | -0.0147<br>(0.4071) | -0.0122<br>(0.4423) | -0.0079<br>(0.3971) | -0.0227<br>(0.4611) | -0.0579<br>(0.8690) | -0.0418<br>(0.8558)  | -0.0012<br>(0.3477) | -0.0419<br>(0.6714) | -0.0309<br>(0.5854) | 0.0051<br>(0.3209)  | -0.0160<br>(0.4301) | -0.0030<br>(0.3453) |
| Coastal (24) vs.<br>offshore western (8)          | 0.0049<br>(0.4321)      | 0.0749<br>(0.1331)       | 0.1368<br>(0.0559)                           | 0.1366<br>(0.0855)  | 0.0594<br>(0.1583)  | 0.1363<br>(0.0167)  | 0.0751<br>(0.1281)  | 0.0406<br>(0.1953)  | 0.0769<br>(0.1535)  | -0.0089<br>(0.3361) | 0.0488<br>(0.1359)   | 0.0609<br>(0.1541)  | 0.0901<br>(0.1101)  | -0.0372<br>(0.2059) | 0.1067<br>(0.0881)  | 0.0239<br>(0.2425)  | 0.0841<br>(0.1269)  |
| Hawaii (5) vs. Coastal<br>(24)                    | 0.1430<br>(0.0026)      | 0.2773<br>(0.0208)       | 0.4166<br>(0.0019)                           | 0.2176<br>(0.0572)  | 0.2767<br>(0.0174)  | -0.0502<br>(0.5687) | 0.4032<br>(0.0028)  | 0.1687<br>(0.0762)  | 0.2175<br>(0.0585)  | -0.2859<br>(0.0254) | 0.2037*<br>(0.0326)  | 0.3643<br>(0.0049)  | 0.1575*<br>(0.0947) | 0.3085<br>(0.0042)  | 0.2660<br>(0.0252)  | 0.2811<br>(0.0202)  | 0.2541<br>(0.0244)  |
| Hawaii (5) vs. Offshore<br>(47)                   | 0.1181<br>(0.0006)      | 0.1582<br>(0.0389)       | 0.1806<br>(0.0422)                           | -0.1282<br>(0.1107) | 0.1882<br>(0.0352)  | -0.0459<br>(0.6156) | -0.2138<br>(0.0124) | -0.0818<br>(0.1323) | 0.1361<br>(0.0632)  | -0.0849<br>(0.1481) | 0.1485*<br>(0.0475)  | 0.2598<br>(0.0082)  | 0.1146*<br>(0.1449) | 0.2609<br>(0.0054)  | 0.1239<br>(0.0593)  | 0.1689<br>(0.0545)  | 0.1303<br>(0.0517)  |
| Hawaii (5) vs.<br>northeastern (25)               | 0.0576<br>(0.2709)      | 0.1308<br>(0.0645)       | 0.1153<br>(0.0962)                           | 0.0809<br>(0.1793)  | 0.1584<br>(0.0353)  | -0.0198<br>(0.4695) | -0.1981<br>(0.0206) | 0.0638<br>(0.1739)  | 0.1099<br>(0.1123)  | 0.1478<br>(0.0714)  | 0.1372*<br>(0.0567)  | 0.2499<br>(0.0102)  | 0.0869*<br>(0.1279) | 0.2751<br>(0.0051)  | 0.0984<br>(0.1029)  | 0.1446<br>(0.0843)  | 0.0951<br>(0.1355)  |
| Hawaii (5) vs.<br>western-southern (17)           | 0.2474<br>(0.0702)      | 0.2273<br>(0.0238)       | 0.2942<br>(0.0284)                           | 0.2139<br>(0.0774)  | 0.2670<br>(0.0297)  | -0.0542<br>(0.8308) | 0.2583<br>(0.0244)  | 0.1353<br>(0.1133)  | -0.1992<br>(0.0547) | 0.2259<br>(0.0286)  | 0.1704*<br>(0.0547)  | 0.3089<br>(0.0196)  | 0.1793*<br>(0.1473) | 0.2751<br>(0.0234)  | 0.1925<br>(0.0356)  | 0.2673<br>(0.0342)  | 0.2062<br>(0.0366)  |
| Hawaii (5) vs.<br>offshore western (8)            | 0.4958<br>(0.0732)      | 0.4932<br>(0.0179)       | 0.4558<br>(0.0318)                           | 0.5298<br>(0.0168)  | 0.4984<br>(0.0148)  | 0.0285<br>(0.3925)  | 0.4640<br>(0.0119)  | 0.4572<br>(0.0364)  | 0.5036<br>(0.0352)  | 0.0013<br>(0.4061)  | 0.3598*<br>(0.0771)  | 0.5523<br>(0.0039)  | 0.4484*<br>(0.0328) | 0.4915<br>(0.0033)  | 0.5093<br>(0.0114)  | 0.1309<br>(0.0689)  | .0924<br>(0.1393)   |
| Hawaii (5) vs.<br>offshore southern (9)           | 0.1509<br>(0.2207)      | 0.1274<br>(0.1167)       | 0.3012<br>(0.0268)                           | 0.0306<br>(0.2757)  | 0.1750<br>(0.0718)  | 0.0443<br>(0.1961)  | 0.2126<br>(0.0202)  | 0.0036<br>(0.4437)  | 0.0161<br>(0.3045)  | 0.1384<br>(0.0872)  | -0.1260*<br>(0.0865) | 0.2138<br>(0.0178)  | 0.0039*<br>(0.2641) | -0.0551<br>(0.0206) | 0.0808<br>(0.1389)  | 0.1382<br>(0.1231)  | 0.5038<br>(0.0198)  |

24 *Table 5. Summary table of pairwise comparisons using both mtDNA and nuDNA data*  
 25 *sets (sample sizes in parentheses). A “☐” denotes significance of whole mtDNA based on*  
 26 *at least one measure (see Tables 2-4). ‘ns’ = non-significant. ‘NA’ = not tested due to*  
 27 *insufficient data. “~” = indicating possible structure with *P*-value between 0.05 and 0.1.*  
 28 *“# Genes” is the number or significant mtDNA genes (“~” + # for low *P*-value genes).*

| Spinner dolphins              | Taxon 1 (n <sub>mt</sub> /n <sub>nuc</sub> ) | Taxon 2 (n <sub>mt</sub> /n <sub>nuc</sub> ) | mtDNA |         | nuDNA |
|-------------------------------|----------------------------------------------|----------------------------------------------|-------|---------|-------|
|                               |                                              |                                              | Whole | # Genes |       |
| Test of endemic subspecies    | Central American (9/7)                       | eastern (53/28)                              | ☐     | 0       | ns    |
| Testing whitebelly intergrade | Central American (9/7)                       | whitebelly (27/21)                           | ~     | 7; ~1   | ns    |
| Testing whitebelly intergrade | eastern (54/28)                              | whitebelly (27/21)                           | ~     | 8; ~1   | ☐     |
| Alternative stock hypotheses  | Tres Marias (21/0)                           | Central American (9/0)                       | ~     | 0       | NA    |
| “”                            | Tres Marias (21/0)                           | Eastern (32/0)                               | ns    | 0       | NA    |
| “”                            | Tres Marias (21/0)                           | Whitebelly (27/0)                            | ~     | 4; ~5   | NA    |
| “”                            | Hawaii (15/0)                                | Whitebelly (27/0)                            | ☐     | 11      | NA    |
| “”                            | Hawaii (15/0)                                | Eastern (32/0)                               | ☐     | 11; ~1  | NA    |
| “”                            | Hawaii (15/0)                                | Central American (9/0)                       | ☐     | 12; ~1  | NA    |
| “”                            | Hawaii (15/0)                                | Tres Marias (21/0)                           | ☐     | 13; ~1  | NA    |

| Spotted dolphins             | Taxon 1 (n <sub>mt</sub> /n <sub>nuc</sub> ) | Taxon 2 (n <sub>mt</sub> /n <sub>nuc</sub> ) | Whole   |        | nuDNA |
|------------------------------|----------------------------------------------|----------------------------------------------|---------|--------|-------|
|                              |                                              |                                              | # Genes |        |       |
| Testing subspecies           | Offshore (52/13)                             | Coastal (24/12)                              | ☐       | 0      | ☐     |
| Testing existing stocks      | Offshore NE (25/0)                           | Off. western-southern (17/0)                 | ns      | 0      | NA    |
| Testing existing stocks      | Offshore NE (25/0)                           | Coastal (24/0)                               | ☐       | 0      | NA    |
| Testing existing stocks      | Offshore WS (17/0)                           | Coastal (24/0)                               | ~       | 0      | NA    |
| Alternative stock hypotheses | Offshore southern (9/0)                      | Offshore western (8/0)                       | ~       | 1; ~9  | NA    |
| “”                           | Offshore NE (25/0)                           | Offshore western (8/0)                       | ~       | 4; ~7  | NA    |
| “”                           | Offshore NE (25/0)                           | Offshore southern (9/0)                      | ns      | 0      | NA    |
| “”                           | Offshore southern (9/0)                      | Coastal (24/0)                               | ~       | 0      | NA    |
| “”                           | Offshore western (8/0)                       | Coastal (24/0)                               | ns      | 1; ~3  | NA    |
| “”                           | Hawaii (5/0)                                 | Coastal (24/0)                               | ☐       | 10; ~4 | NA    |
| “”                           | Hawaii (5/0)                                 | Offshore (52/0)                              | ☐       | 6; ~4  | NA    |
| “”                           | Hawaii (5/0)                                 | Offshore NE (25/0)                           | ~       | 4; ~4  | NA    |
| “”                           | Hawaii (5/0)                                 | Offshore WS (17/0)                           | ☐       | 9; ~3  | NA    |
| “”                           | Hawaii (5/0)                                 | Offshore western (8/0)                       | ☐       | 10; ~2 | NA    |
| “”                           | Hawaii (5/0)                                 | Offshore southern(9/0)                       | ns      | 5; ~3  | NA    |

29 *Figure 1. Sampling localities and range map for spinner dolphins within the ETP.*  
30 *Subspecies and stock boundaries based on Perrin et al. 1985. Red dots indicate Central*  
31 *American spinners. Blue symbols indicate eastern spinners - boxes are the proposed Tres*  
32 *Marias form. Green dots indicate whitebelly spinners, a proposed intergrade between the*  
33  
34

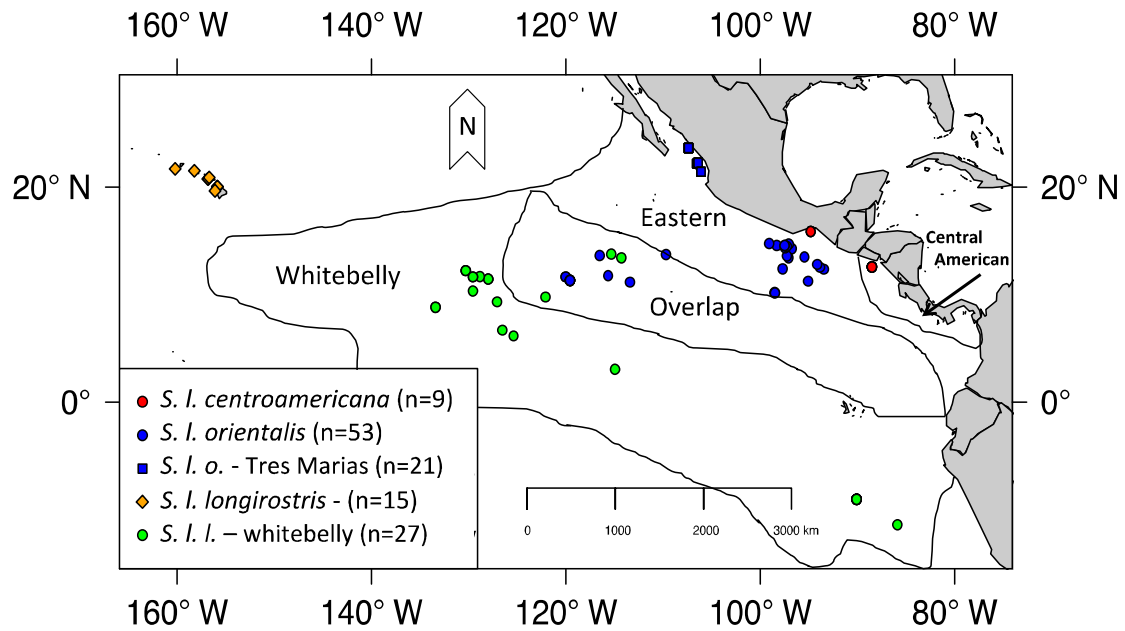

35



36 *Figure 2.* Sampling localities for spotted dolphins with ETP subspecies and stock  
37 boundaries based on Perrin *et al.* 1985. Coastal spotted dolphins (*S. a. graffmani*) are in  
38 red and offshore (*S. a. attenuata*) are in blue. Blue circles indicate sampling locations for  
39 the northeastern stock of offshore spotted dolphins. Blue triangles indicate samples from  
40 Hawaii. Inverted triangles indicate southern offshore samples that were removed from  
41 analyses of offshore stocks because they were collected between 4°N and 6°N; these  
42 samples were included in subspecies-level analyses. Animals that represent the western  
43 substock were the group of blue squares west of 120°W and animals representing the  
44 southern sub-stock were the group of blue squares taken from south of the 5°N stock  
45 boundary. Samples sizes for mtDNA analyses presented in the key; for nuDNA sample  
46 sizes, see Table 3.

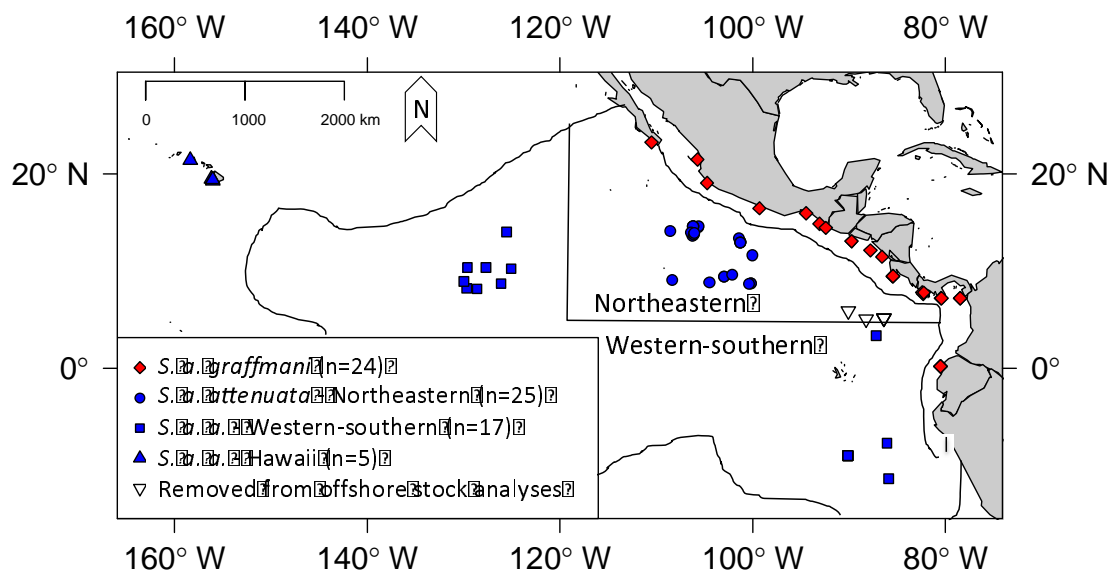

47
